# Supplementary material
Source: PubMed Central journal article supplement (PMC7677695)
Supplement: mmc1.pdf [file mmc1.pdf]

**Molecular Cell, Volume 80**

**Supplemental Information**

**Phosphoregulation of Phase Separation by the  
SARS-CoV-2 N Protein Suggests a Biophysical  
Basis for its Dual Functions**

**Christopher R. Carlson, Jonathan B. Asfaha, Chloe M. Ghent, Conor J. Howard, Nairi Hartooni, Maliheh Safari, Alan D. Frankel, and David O. Morgan**

|       |     |                                                                      |     |
|-------|-----|----------------------------------------------------------------------|-----|
| CoV   | 1   | MSDNGPQSNQRSAPRITFFGGPTDSTDNNQNGGRNGARPKQRRPQGLPNNTASWFTALTQH        | 60  |
| CoV-2 | 1   | <u>MSDNGPQ-NQRNAPRITFFGGPSDSTGNSQNGERSGARSKQRRPQGLPNNTASWFTALTQH</u> | 59  |
| NTE   |     |                                                                      |     |
| CoV   | 61  | GKEELRFPRGQGVPIINTNSGPDDQIGYYRRATRRVRGGDGKMKELSPRWYFYLLGTGPEA        | 120 |
| CoV-2 | 60  | GKEDLKFPRGQGVPIINTNSSPDDQIGYYRRATRRIRGGDGKMKDLSPRWYFYLLGTGPEA        | 119 |
| CoV   | 121 | SLPYGANKEGIVVATEGALNTPKDHIGTRNPNNNAATVLQLPQGTTLPKGFYAEGSRGG          | 180 |
| CoV-2 | 120 | GLPYGANKDGIIVVATEGALNTPKDHIGTRNPANNAIIVLQLPQGTTLPKGFYAEGSRGG         | 179 |
| CoV   | 181 | SQASSRSSSRSRGNSRNSTPGSSRGNSPARMASGGGETALALLLLDRLNQLESKVSQKQ          | 240 |
| CoV-2 | 180 | <u>SQASSRSSSRSRNSSRNSTPGSSRGTS</u> PARMAGNGGDAALALLLLDRLNQLESKMSGKQ  | 239 |
| SR    |     |                                                                      |     |
| CoV   | 241 | QQQGQTVTKKSAAEASKKPRQKRTATKQYNVTQAFGRRGPEQTQGNFGDQDLIRQGTDYK         | 300 |
| CoV-2 | 240 | QQQGQTVTKKSAAEASKKPRQKRTATKAYNVTQAFGRRGPEQTQGNFGDQELIRQGTDYK         | 299 |
| CBP   |     |                                                                      |     |
| CoV   | 301 | HWPQIAQFAPSASAFFGMSRIGMEVTPSGTWLTYHGAIKLDKDPQFKDQNVILLNKHIDA         | 360 |
| CoV-2 | 300 | HWPQIAQFAPSASAFFGMSRIGMEVTPSGTWLTYTGAIKLDKDPNFKDQNVILLNKHIDA         | 359 |
| CoV   | 361 | YKTFPTEPKKDKKKKTDEAQLPQRQKKQPTVTLLPAADMDDFSRQLQNSMSGASADST           | 420 |
| CoV-2 | 360 | <u>YKTFPTEPKKDKKKKADE</u> TAALPQRQKKQPTVTLLPAADLDDFSKQLQQSMS--SADST  | 417 |
| CTE   |     |                                                                      |     |
| CoV   | 421 | QA                                                                   | 422 |
| CoV-2 | 418 | <u>QA</u>                                                            | 419 |

**Figure S1. Amino acid sequences of N proteins from SARS-CoV and SARS-CoV-2, related to Figure 1A.**

The two globular domains, NTD and CTD, are highlighted in gray. Underlining indicates the four regions analyzed by deletion mutants. Acidic residues highlighted in pink, basic residues highlighted in blue, and phosphorylation sites of the SR region highlighted in yellow.

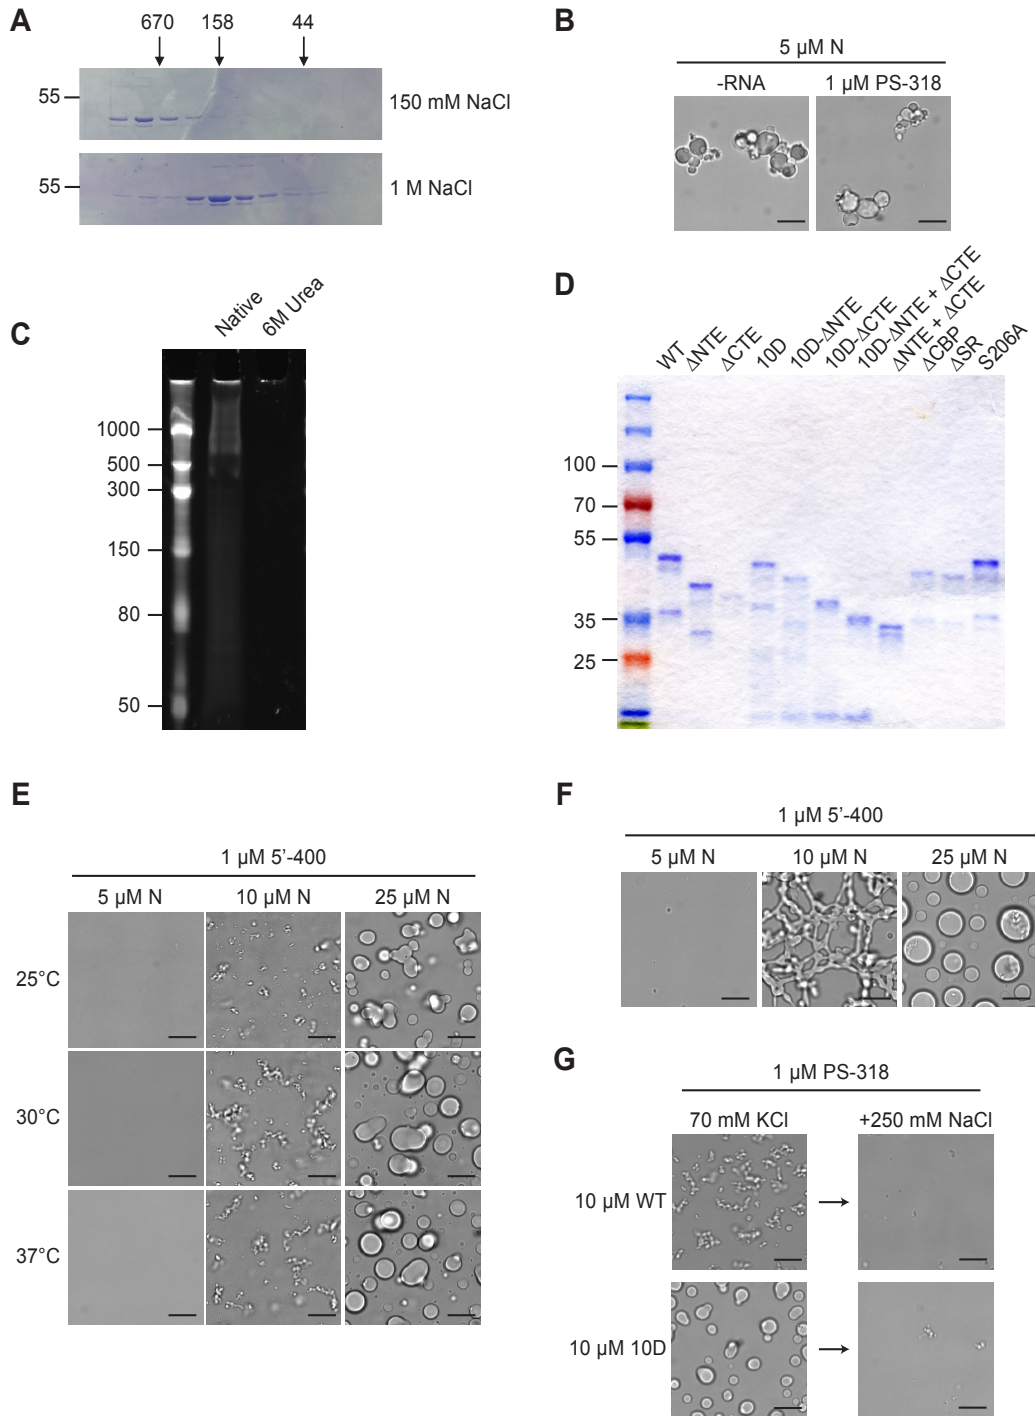

**Figure S2. Characterization of N protein behavior, related to Figure 1B.**

(A) Superdex 200 gel filtration analysis of native N protein at 150 mM or 1 M NaCl, purified under non-denaturing conditions. Arrows at top indicate migration of molecular weight standards (kDa). Fractions were analyzed by SDS-PAGE and Coomassie Blue staining.

(B) Representative images of 5  $\mu$ M native N protein after incubation in the presence or absence of 1  $\mu$ M PS-318 RNA. Scale bar, 10  $\mu$ m.

(C) 5  $\mu$ l of 10  $\mu$ M N protein (purified under native or denaturing [6M Urea] conditions) was mixed with urea loading buffer, incubated at 65°C for 5 min, and separated on a 10% polyacrylamide TBE-Urea gel, followed by staining with SYBR Gold. RNA length standards (nt) in left lane.

(D) SDS-PAGE analysis of all N protein mutants used in this study, stained with Coomassie Blue.

(E) N protein was incubated at the indicated temperature for 30 min in the presence of 1  $\mu$ M 5'-400 RNA. Scale bar, 10  $\mu$ m.

(F) N protein was incubated with 1  $\mu$ M 5'-400 for 16 h at room temperature. Scale bar, 10  $\mu$ m.

(G) Condensates of 10  $\mu$ M WT or 10D N protein were formed in droplet buffer (70 mM KCl) by incubation with 1  $\mu$ M PS-318 RNA for 30 min and imaged. NaCl was then added to a final concentration of 250 mM for 15 min before imaging again.

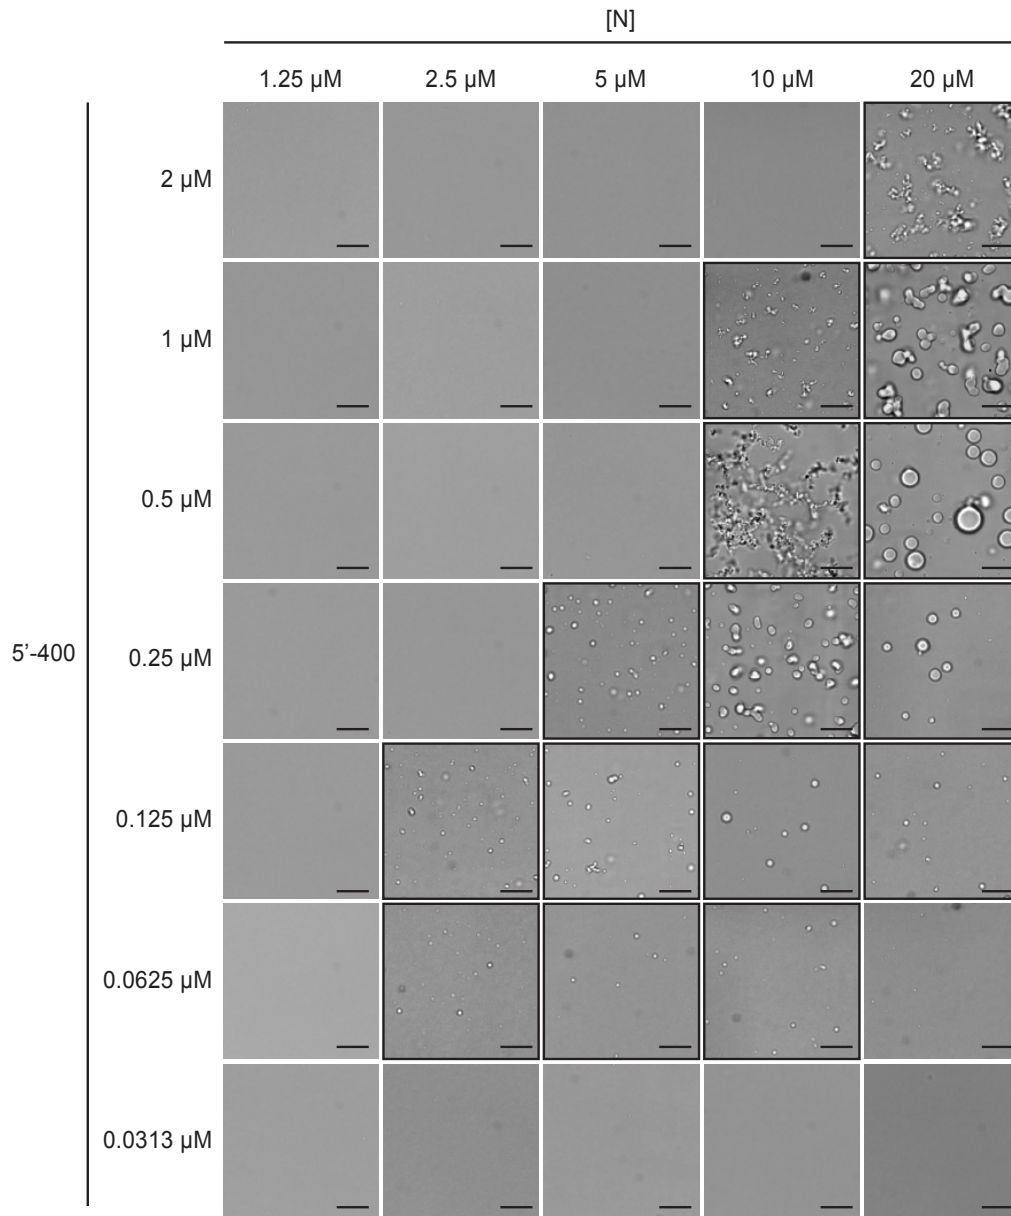

**Figure S3. Condensate formation at a range of N protein and 5'-400 RNA concentrations, related to Figure 1C.**

Light microscopy images of N protein condensates after 30 min incubation at room temperature with the indicated concentrations of 5'-400 RNA. Images that contain visible condensates are highlighted with a black border. Scale bar, 10  $\mu$ m.

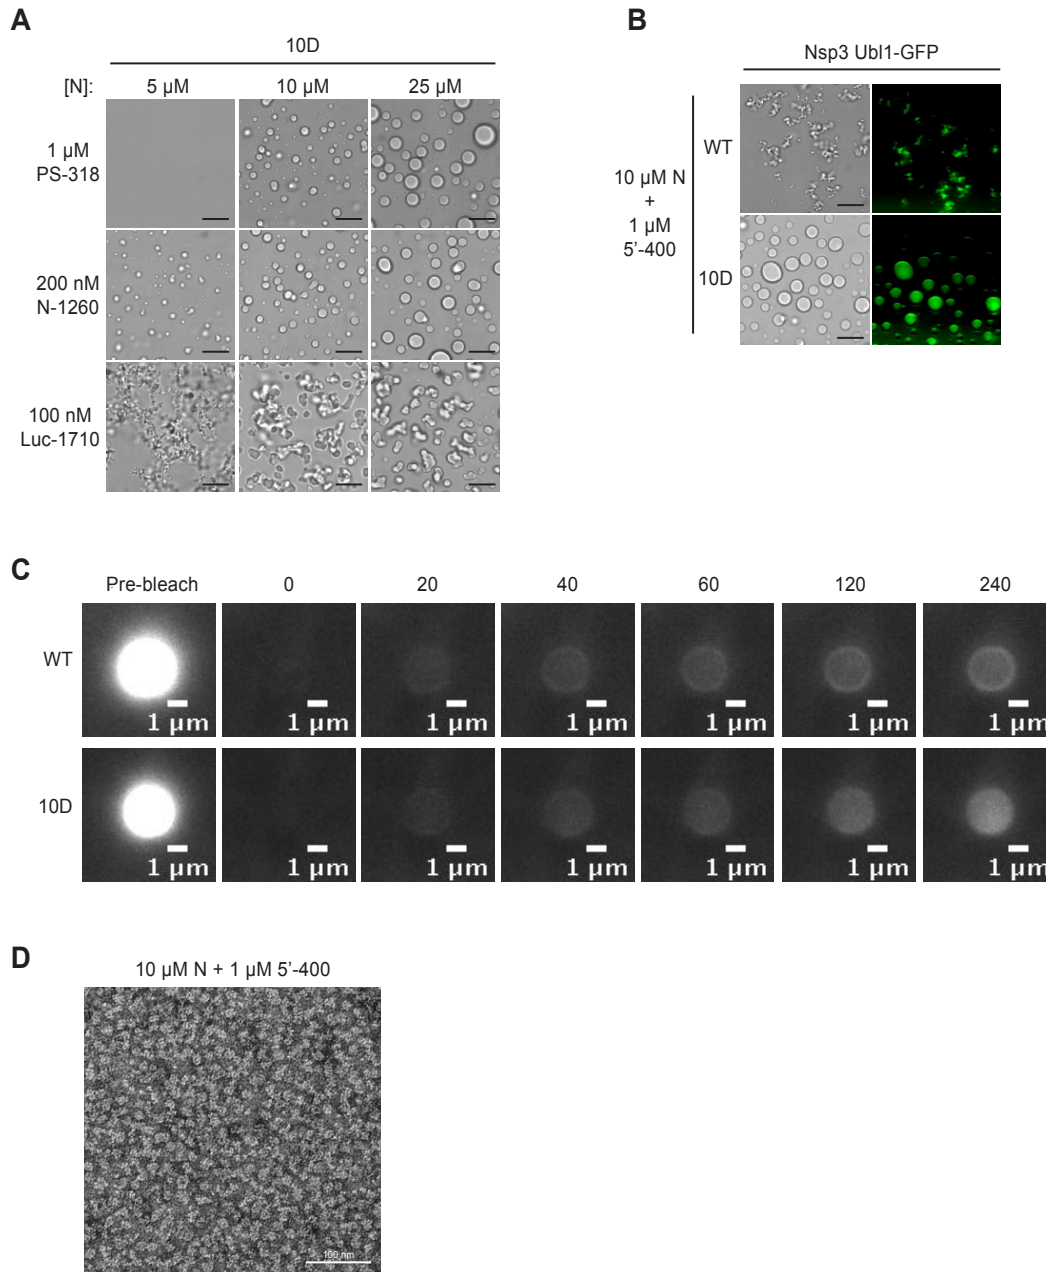

**Figure S4. Properties of wild-type N protein and 10D mutant, related to Figures 3 and 4.**

(A) Images of N protein 10D mutant following 30 min incubation with the indicated RNAs. Scale bar, 10  $\mu\text{m}$ .

(B) 10  $\mu\text{M}$  wild-type (WT) or 10D N protein was incubated with 1  $\mu\text{M}$  5'-400 RNA for 10 min. Nsp3 Ubl1-GFP was then added to a concentration of 1  $\mu\text{M}$  and incubated for an additional 15 min before imaging in brightfield (left) or fluorescence (right).

(C) Images of droplets formed with 20  $\mu\text{M}$  fluorescent N protein (WT or 10D) and 1  $\mu\text{M}$  5'-400 RNA, before photobleaching and at the indicated times (s) after bleaching. Scale bar, 1  $\mu\text{m}$ .

(D) 10  $\mu\text{M}$  wild-type N protein was incubated with 1  $\mu\text{M}$  5'-400 RNA for 15 min prior to analysis by negative-stain electron microscopy. Scale bar, 100 nm.

**Table S1. RNA sequences used in this study, related to Figures 1-4.**

|                                                                                                                                                                                               |                                                                                                                                                                                                                                                                                                                                                                                                                                                                                                                                                                                                                                                                                                                                                                                                                                                                                                                                                                                                                                                                                                                                                                                                                                                                                                                                                                                                                                                                                                                                                                                                                                                                        |
|-----------------------------------------------------------------------------------------------------------------------------------------------------------------------------------------------|------------------------------------------------------------------------------------------------------------------------------------------------------------------------------------------------------------------------------------------------------------------------------------------------------------------------------------------------------------------------------------------------------------------------------------------------------------------------------------------------------------------------------------------------------------------------------------------------------------------------------------------------------------------------------------------------------------------------------------------------------------------------------------------------------------------------------------------------------------------------------------------------------------------------------------------------------------------------------------------------------------------------------------------------------------------------------------------------------------------------------------------------------------------------------------------------------------------------------------------------------------------------------------------------------------------------------------------------------------------------------------------------------------------------------------------------------------------------------------------------------------------------------------------------------------------------------------------------------------------------------------------------------------------------|
| <p><b>5'-400</b></p> <p>5' 400 nt from SARS-CoV-2 (Wuhan Hu-1 strain; nt 1-400).</p>                                                                                                          | <p>AUUAAAGGUUUUAUACCUUCCCAGGUAACAAACCAACCAACUUUCGAU<br/> CUCUUGUAGAUCUGUUCUCUAAACGAACUUUAAAAUCUGUGUGGCU<br/> GUCACUCGGCUGCAUGCUUAGUGCACUCACGCAGUAUAAUUAAUAA<br/> CUAAUUACUGUCGUUGACAGGACACGAGUAACUCGUCUAUCUUCUG<br/> CAGGCUGCUUACGGUUUCGUCCGUGUUGCAGCCGAUCAUCAGCACA<br/> UCUAGGUUUCGUCCGGGUGUGACCGAAAGGUAAGAUGGAGAGCCUU<br/> GUCCUGGUUUCAACGAGAAAACACACGUCCAACUCAGUUUGCCUG<br/> UUUUACAGGUUCGCGACGUGCUCGUACGUGGCUUUGGAGACUCCG<br/> UGGAGGAGGUCUUAUCAGAGGCACGUCAACAU</p>                                                                                                                                                                                                                                                                                                                                                                                                                                                                                                                                                                                                                                                                                                                                                                                                                                                                                                                                                                                                                                                                                                                                                                                                |
| <p><b>PS-318</b></p> <p>318 nt from SARS CoV (Tor2 strain; nt 19715-20031), with an extra C (red) after A19802 as in (Woo et al., 2019).</p>                                                  | <p>UGAGCUUUGGGCUAAGCGUAACAUUAAACCAGUGCCAGAGAUUAAG<br/> AUACUCAAUAAUUUGGGUGUUGAUUUCGUCUAAUACUGUAACAU<br/> UGGGACUACAAAAGAGAAGCCCCAGCACAUGUAUCUACAAUAGGUG<br/> UCUGCACAAUGACUGACAUUGCCAAGAAACCUACUGAGAGUGCUUG<br/> UUCUUCACUACUGUCUUGUUUGAUGGUAGAGUGGAAGGACAGGUA<br/> GACCUUUUJAGAAACGCCCGUAAUGGUGUUUUAAUACAGAAGGUU<br/> CAGUCAAAGGUCUAACACCUUCAAGGGACCAGCACAAGCUA</p>                                                                                                                                                                                                                                                                                                                                                                                                                                                                                                                                                                                                                                                                                                                                                                                                                                                                                                                                                                                                                                                                                                                                                                                                                                                                                                   |
| <p><b>N-1260</b></p> <p>RNA containing the 1260 nt open reading frame (gray highlight) of the N gene from SARS-CoV-2 (Wuhan Hu-1 strain; nt 28274-29533), plus flanking plasmid sequence.</p> | <p>GGGAAUUGUGAGCGGAUAACAAUUCGCCUCUAGAAUAAUUUUUGUU<br/> UAACUUUAAGAAGGAGAUUACCAUGGGCAGCAGCCAUCAUCAUCAU<br/> CAUCACAGCAGCGGCCUGGUGCCGCGCGGUACCACGGAAAACCGUGU<br/> AUUUUCAGGGAUCCAUGUCUGAUAAUGGACCCCAAAAUCAGCGAAAU<br/> GCACCCCGCAUUACGUUUGGUGGACCCUCAGAUUCAACUGGCAGUA<br/> ACCAGAAUGGAGAACGCAGUGGGGCGCGAUCAAAACAACGUCGGCC<br/> CCAAGGUUUACCCAUAUACUGCGUCUUGGUUCACCGCUCUCACU<br/> CAACAUGGCAAGGAAGACCUUAAAUUCUCGAGGACAAGGCGUUC<br/> CAAUUAACACCAAUAGCAGUCCAGAUGACCAAAUUGGCUACUACCGA<br/> AGAGCUACCAGACGAAUUCGUGGUGGUGACGGUAAAAUGAAAGAUC<br/> UCAGUCCAAGAUGGUAAUUUCUACUACCUAGGAACUGGGCCAGAAGC<br/> UGGACUUCUUUGGUGCUAACAAAGACGGCAUCAUUGGGUUGCA<br/> ACUGAGGGGAGCCUUGAAUACACCAAAAGAUCAAUUGGCACCCGCAA<br/> UCCUGCUAACAAUGCUGCAAUCGUGCUACAACUCCUCAAGGAACAA<br/> CAUUGCCAAAAGGCUUCUACGCAGAAGGGAGCAGAGGGCGGCAGUCA<br/> AGCCUCUUCUGUUCUCUACACGUAGUCGCAACAGUUCAGAAAU<br/> UCAACUCCAGGCAGCAGUAGGGGAACUUCUCCUGCUAGAAUGGCUG<br/> GCAAUGGCGGUGAUGCUGCUCUUGCUUUGCUGCUGCUUGACAGAU<br/> UGAACCAGCUUGAGAGCAAAAUGUCUGGUAAAGGCCAACAACAACA<br/> GGCCAAACUGUCACUAAGAAAUCUGCUGCUGAGGCUUCUAAGAAGC<br/> CUCGGCAAAAACGUACUGCCACUAAAGCAUACA AUGUAACACAAGCU<br/> UUCGGCAGACGUGGUCCAGAACAACCCAAGGAAUUUUUGGGGACC<br/> AGGAACUAAUCAGACAAGGAACUGAUUACAACA AUUGGCCGCAAAU<br/> GCACA AUUUGCCCCAGCGCUUCAGCGUUCUUCGGAAUGUCGCGCA<br/> UUGGCAUGGAAGUCACACCUUCGGGAACGUGGUUGACCUACACAGG<br/> UGCCAUCAAAUUGGAUGACAAAGAUCCAAAUUCAAAGAUCAAGUCA<br/> UUUUGCUGAAUAAGCAU AUUGACGCAUACAACA AUUCCACCAACA<br/> GAGCCUAAAAGGACAAAAGAAGGAGGCUAUGAAACUCAAGCCUU<br/> ACCGCAGAGACAGAAGAAACAGCAAACUGUGACUCUUCUUCUGCU<br/> GCAGAUUUGGAUGAUUUCUCCAACA AUUGCAACA AUCCAUGAGCAG<br/> UGCUGACUCAACUCAGGCCUAAGAAUUCGAGCUCUGGUGGAC</p> |

**Luc-1710**

RNA containing the 1710 nt firefly luciferase open reading frame (gray highlight) plus flanking plasmid sequence.

GGUCUAGAAAUAUUUUUGUUUAACUUUAAGAAGGAGAUUAACCAUG  
AAAAUCGAAGAAGGUAAAAGGUCACCAUCACCAUCACCACGGAUCCA  
GGAAGACGCCAAAAACAUAAGAAAGGCCCGGCCAUUCUAUCCUC  
UAGAGGAUGGAACCGCUGGAGAGCAACUGCAUAAGGCUAUGAAGAG  
AUACGCCUCGGUUCUGGAACAAUUGCUIUUACAGAUGCACAUUAC  
GAGGUGAACAUACGUACGCGGAAUACUUCGAAAUGUCCGUUCGGU  
UGGCAGAAGCUAUGAAACGAUAUGGGCUGAAUACAAAUCACAGAAUC  
GUCGUAUGCAGUGAAAACUCUCUUCAAUUCUUAUGCCGGUGUUGG  
GCGCGUUUUUAUCGGAGUUGCAGUUGC GCCCGCGAACGACAUUU  
UAAUGAACGUGAAUUGCUC AACAGUAUGAACAUUUCGCAGCCUACC  
GUAGUGUUUGUUUCCAAAAAGGGGUUGCAAAAAUUUUGAACGUGC  
AAAAAAAAUUACCAUAAUCCAGAAAAUUUUUAUCAUGGAUUCUAAAA  
CGGAUUACCAGGGAUUUCAGUCGAUGUACACGUUCGUCACAUCUCA  
UCUACCUC CCGGUUUUAAUGAAUACGAUUUUGUACCAGAGUCCUUU  
GAUCGUGACAAAACA AUUGCACUGAUAAUGAAUUCUCUGGAUCUAC  
UGGGUUACCUAAGGGUGUGGCCCUUCCGCAUAGAACUGCCUGCGU  
CAGAUUCUCGCAUGCCAGAUCCU AUUUUUGGCAUCAAUUCAUU  
CCGGAUACUGCGAUUUUAAGUGUUUGUCCAUUCCAGGUUUUG  
GAAUGUUUACUACACUCGGAU AUUUGAUUUGGAUUUCGAGUCGU  
CUUAAUGUAUAGAUUUGAAGAAGAGCUGUUUUACGAUCCCUUCAG  
GAUUACA AAAUUC AAAGUGCGUUGCUAGUACCAACCCU AUUUUUCAUU  
CUUCGCCAAAAGCACUCUGAUUGACAAAUACGAUUUAUCUAAUUUAC  
ACGAAAUUGCUUCUGGGGGCGCACCUUUCGAAAGAAGUCGGGGGA  
AGCGGUUGCAAAACGCUUCCAUCUUC CAGGGAUACGACAAGGAU AU  
GGGCUCACUGAGACUACAUCAGCUAUUCUGAUUACACCCGAGGGGG  
AUGAUAAACCGGGCGCGGUCGGUAAAGUUGUCCAUUUUUUGAAGC  
GAAGGUUGUGGAUCUGGAUACCGGAAAACGUCGGGCGUUAUCAG  
AGAGGCGAAUUAUGUGUCAGAGGACCUAUGAUUAUGUCCGGUUAUG  
UAAACA AUCCGGAAGCGACCAACGCCUUGAUUGACAAGGAUUGGAUG  
GCUACA UUCUGGAGACAUAGCUUACUGGGACGAAGACGAACACUUC  
UUCAUAGUUGACCGCUUGAAGUCUUUAAUUAAAUA CAAGGAUUAUCA  
GGUGGCCCCCGCUGAAUUGGAAUCGAU AUUGUUACAACACCCCAAC  
AUCUUCGACGCGGGCGUGGCAGGUCUUC CCGACGAUGACGCCGGU  
GAACUUC CCGCCCGUUGUUGUUUGGAGCACGGAAAGACGAUGA  
CGGAAAAGAGAUUCGUGGAUACGUCGCCAGUCAAGUAACAACCGC  
GAAAAGUUGCGCGGAGGAGUUGUGUUUGUGGACGAAGUACCGAAA  
GGUCUUAACCGGAAAACUCGACGCAAGAAAAAU CAGAGAGAUCCUCAU  
AAAGGCCAAGAAGGGCGGAAAGUCCAAACUCGAGUAAGGUUAACCU  
GCAGGAGG
