# Supplementary material
Source: PubMed Central journal article supplement (PMC7677695)
Supplement: mmc2.pdf [file mmc2.pdf]

# Phosphoregulation of Phase Separation by the SARS-CoV-2 N Protein Suggests a Biophysical Basis for its Dual Functions

## Graphical Abstract

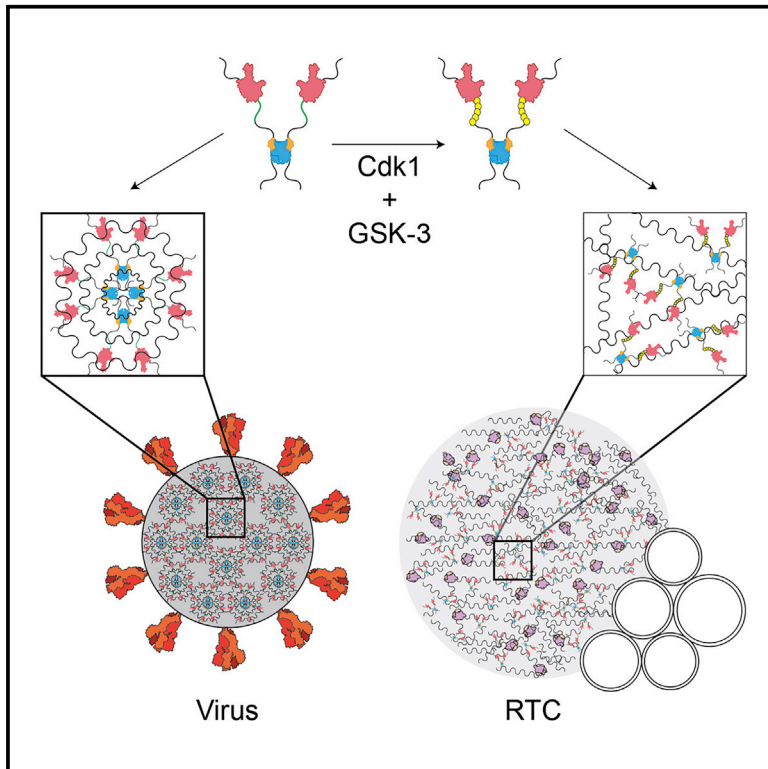

## Authors

Christopher R. Carlson,  
Jonathan B. Asfaha,  
Chloe M. Ghent, ..., Maliheh Safari,  
Alan D. Frankel, David O. Morgan

## Correspondence

david.morgan@ucsf.edu

## In Brief

Carlson et al. demonstrate that the nucleocapsid (N) protein of SARS-CoV-2, together with viral RNA, forms gel-like biomolecular condensates and particles that are consistent with its genome-packaging role. Phosphorylation transforms condensates into liquid-like droplets, which may provide a cytoplasmic compartment to support the protein's function in viral genome transcription.

## Highlights

- Nucleocapsid protein of SARS-CoV-2 forms biomolecular condensates with viral RNA
- Unmodified N protein forms gel-like condensates containing discrete RNP particles
- Phosphorylated N protein forms dynamic, liquid-like condensates
- The two condensate forms are well suited for the two major functions of N protein

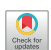

## Short Article

# Phosphoregulation of Phase Separation by the SARS-CoV-2 N Protein Suggests a Biophysical Basis for its Dual Functions

Christopher R. Carlson,<sup>1,3,4</sup> Jonathan B. Asfaha,<sup>1,3,4</sup> Chloe M. Ghent,<sup>1,4</sup> Conor J. Howard,<sup>2,3</sup> Nairi Hartooni,<sup>1,3</sup> Maliheh Safari,<sup>2</sup> Alan D. Frankel,<sup>2,3</sup> and David O. Morgan<sup>1,3,5,\*</sup>

<sup>1</sup>Department of Physiology, University of California, San Francisco, San Francisco, CA 94143, USA

<sup>2</sup>Department of Biochemistry & Biophysics, University of California, San Francisco, San Francisco, CA 94143, USA

<sup>3</sup>Tetrad Graduate Program, University of California, San Francisco, San Francisco, CA 94143, USA

<sup>4</sup>These authors contributed equally

<sup>5</sup>Lead Contact

\*Correspondence: [david.morgan@ucsf.edu](mailto:david.morgan@ucsf.edu)

<https://doi.org/10.1016/j.molcel.2020.11.025>

## SUMMARY

The nucleocapsid (N) protein of coronaviruses serves two major functions: compaction of the RNA genome in the virion and regulation of viral gene transcription. It is not clear how the N protein mediates such distinct functions. The N protein contains two RNA-binding domains surrounded by regions of intrinsic disorder. Phosphorylation of the central disordered region promotes the protein's transcriptional function, but the underlying mechanism is not known. Here, we show that the N protein of SARS-CoV-2, together with viral RNA, forms biomolecular condensates. Unmodified N protein forms partially ordered gel-like condensates and discrete 15-nm particles based on multivalent RNA-protein and protein-protein interactions. Phosphorylation reduces these interactions, generating a more liquid-like droplet. We propose that distinct oligomeric states support the two functions of the N protein: unmodified protein forms a structured oligomer that is suited for nucleocapsid assembly, and phosphorylated protein forms a liquid-like compartment for viral genome processing.

## INTRODUCTION

Coronaviruses are enveloped viruses with an ~30-kb positive-sense single-stranded RNA genome, packed tightly inside the ~100-nm virion in a poorly defined structure called the nucleocapsid. Condensation of the genome into the compact nucleocapsid structure depends primarily on the nucleocapsid (N) protein, one of the four major structural proteins encoded in the viral genome (Fung and Liu, 2019; Laude and Masters, 1995; Masters, 2006).

Following viral entry and disassembly of the nucleocapsid, the genome is translated to produce RNA-dependent RNA polymerase and numerous other non-structural proteins (Nsps) (Fung and Liu, 2019; Kim et al., 2020; Snijder et al., 2016; Sola et al., 2015). These proteins rearrange membranes of the endoplasmic reticulum to form the replication transcription complex (RTC) (den Boon and Ahlquist, 2010; Hagemeyer et al., 2012; Knoop et al., 2008; Neuman et al., 2014; Snijder et al., 2020; Stertz et al., 2007; Ulasli et al., 2010; Wolff et al., 2020), which is thought to provide a scaffold for the viral proteins that perform genome replication and transcription and which might also shield these processes from the host cell's innate immune response.

Using genomic (+) RNA as a template, the viral polymerase produces (–) RNA transcripts of subgenomic regions encoding the viral structural proteins (S, E, M, and N) (Fung and Liu, 2019; Kim et al., 2020; Snijder et al., 2016; Sola et al., 2015). Subgenomic transcription involves a template-switching mechanism in which the polymerase completes transcription of a structural protein gene and then skips to a transcription-regulating sequence (TRS) at the 5' end of the genome, resulting in subgenomic (–) RNA fragments—which are then transcribed to produce (+) RNA for translation. N protein is encoded by the most abundant subgenomic RNA and is translated at high levels early in infection. The N protein is the most abundant viral protein in the infected cell (Bouhaddou et al., 2020; Laude and Masters, 1995; Masters, 2006) and accumulates in dynamic clusters at RTCs (Bost et al., 2000; Cong et al., 2020; Snijder et al., 2020; Stertz et al., 2007; Ulasli et al., 2010; V'kovski et al., 2019; Verheije et al., 2010; Verheije et al., 2008) where it is thought to help promote the RNA structural rearrangements required for subgenomic transcription (Almazán et al., 2004; Wu et al., 2014; Zúñiga et al., 2010).

The structural features of the N protein are well conserved among coronaviruses. The ~46-kDa N proteins of SARS-CoV

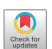

and SARS-CoV-2 are ~90% identical. The N protein contains two globular domains, the N- and C-terminal domains (NTD and CTD, respectively), surrounded by intrinsically disordered regions (Chang et al., 2014) (Figure 1A, Figure S1). N protein is highly basic (pI ~10), and multiple RNA-binding sites are found throughout the protein (Chang et al., 2009). The NTD is an RNA-binding domain (Fan et al., 2005; Huang et al., 2004; Jayaram et al., 2006; Kang et al., 2020). The CTD forms a tightly linked dimer with a large RNA-binding groove (Chen et al., 2007; Takeda et al., 2008; Ye et al., 2020; Zuwala et al., 2015), and the fundamental unit of N protein structure is a dimer (Luo et al., 2004; Yu et al., 2005). Under some conditions, the dimer self-associates to form oligomers that depend on multiple protein regions (Chang et al., 2013; Chen et al., 2007; Cong et al., 2017; He et al., 2004; Hurst et al., 2009; Luo et al., 2006; Luo et al., 2005; Ye et al., 2020; Zuwala et al., 2015). The biochemical features and function of these oligomers are not clear.

The central disordered linker contains a conserved serine-arginine (SR)-rich sequence that is likely to serve as a key regulatory hub in N protein function. Early in infection, the SR region is rapidly phosphorylated at multiple sites by cytoplasmic kinases (Bouhaddou et al., 2020; Davidson et al., 2020; Fung and Liu, 2018; Klann et al., 2020; Peng et al., 2008; Stohlman et al., 1983; Surjit et al., 2005; White et al., 2007; Wu et al., 2014; Wu et al., 2009). Phosphorylation leads to association with the RNA helicase DDX1, which promotes RNA structural changes required for transcription of long subgenomic RNAs in the RTC (Wu et al., 2014). Later in infection, nucleocapsid formation and viral assembly do not seem to require N protein phosphorylation, which is substantially reduced in the nucleocapsid of MHV and SARS-CoV virions (Wu et al., 2014; Wu et al., 2009). We have little understanding of the molecular mechanisms by which phosphorylation influences N protein function.

To gain a better understanding of N protein function and its control by phosphorylation, we explored the biochemical properties of the N protein from SARS-CoV-2, the causative agent of the ongoing COVID-19 pandemic. We found that N protein and viral RNA form biomolecular condensates (Alberti et al., 2019; Banani et al., 2017; Owen and Shewmaker, 2019; Shin and Brangwynne, 2017; Tauber et al., 2020). The ordered, gel-like condensates of the unmodified protein are changed to more liquid-like droplets by phosphorylation, providing a potential structural foundation for the distinct functions of the N protein in nucleocapsid assembly and genome processing.

## RESULTS

### N Protein of SARS-CoV-2 Forms RNA-Dependent Biomolecular Condensates

Purified N protein produced in bacteria migrated on gel filtration as a dimer in high salt but as a large oligomer in physiological salt (Figure S2A). Light microscopy revealed the presence of liquid-like droplets in the presence and absence of added RNA (Figure S2B), suggesting that N protein forms biomolecular condensates. We noted, however, that purified N protein contained nucleic acid, even after nuclease treatment, raising the possibility that structures seen in the absence of added RNA were due to tightly bound contaminating RNA. Following removal of RNA

by protein denaturation and renaturation (Figure S2C), the protein displayed few microscopic structures, but addition of viral RNA greatly enhanced the formation of structures similar to those in the native preparation (Figure 1B). We conclude that RNA is required for the formation of the higher-order oligomers seen in the microscope. All subsequent studies were performed with denatured and renatured proteins (Figure S2D).

We analyzed the effects of three mid-sized viral RNA fragments: (1) 5'-400, containing the 400 nt at the 5' end of the SARS-CoV-2 genome, which is thought to include multiple secondary structure elements and the leader TRS (Chen and Olsthoorn, 2010; Yang and Leibowitz, 2015; Yang et al., 2015); (2) PS-318, a 318-nt sequence near the end of ORF1b in SARS-CoV, proposed as a packaging sequence (Hsieh et al., 2005; Woo et al., 2019) but of unknown function (Chen and Olsthoorn, 2010; Masters, 2019); and (3) N-1260, a 1260-nt sequence containing the open reading frame of the N gene near the 3' end of the SARS-CoV-2 genome. RNA encoding firefly luciferase (Luc-1710) was a nonviral control. N protein structures were analyzed by microscopy 30 min after addition of RNA at room temperature (Figure 1B). At 10  $\mu$ M N protein, the three viral RNAs rapidly generated branched networks of liquid-like beads. Higher N protein concentrations produced large liquid-like droplets several microns in diameter. Nonviral RNA led to amorphous filamentous aggregates with partial liquid-like appearance. For most subsequent studies, we used 5'-400 RNA as a representative viral RNA.

Incubation at higher temperature (30°C or 37°C) had little effect on droplet formation in a 30-min incubation (Figure S2E), and longer incubations did not transform filamentous networks into droplets (Figure S2F). High salt dissolved N protein structures, indicating that they depend primarily on electrostatic interactions (Figure S2G).

We analyzed the formation and morphology of condensates over a wide range of N protein and 5'-400 RNA concentrations (Figures S3 and 1C, top row). At low RNA concentrations, small spherical droplets were seen at multiple N protein concentrations. Higher RNA and protein concentrations led to filamentous structures. Interestingly, at RNA concentrations approaching those of N protein, no structures were formed. These results suggest that condensates depend on the crosslinking of multiple N proteins by a single RNA.

We tested the importance of multivalent RNA binding by measuring the effects of a 10-nt RNA carrying the TRS sequence of SARS-CoV-2. The TRS sequence is thought to bind primarily to the NTD, with some contribution from the adjacent SR region (Grossoehme et al., 2009; Keane et al., 2012). Surprisingly, addition of the TRS RNA triggered the rapid formation of droplets without the filamentous structures seen with longer viral RNAs (Figures 1B and 1C). Also in contrast to results with longer RNAs, droplet formation was greatly reduced when the N protein was in molar excess over the TRS RNA (Figures 1B and 1C), indicating that RNA-free N protein exerts a dominant inhibitory effect on the formation of TRS-bound oligomers. Droplets formed when TRS RNA was equimolar with or in excess of N protein (Figure 1C), suggesting that these droplets depend on the binding of a single TRS RNA to each N protein. A 10-nt RNA with a random sequence displayed similar behavior but at higher

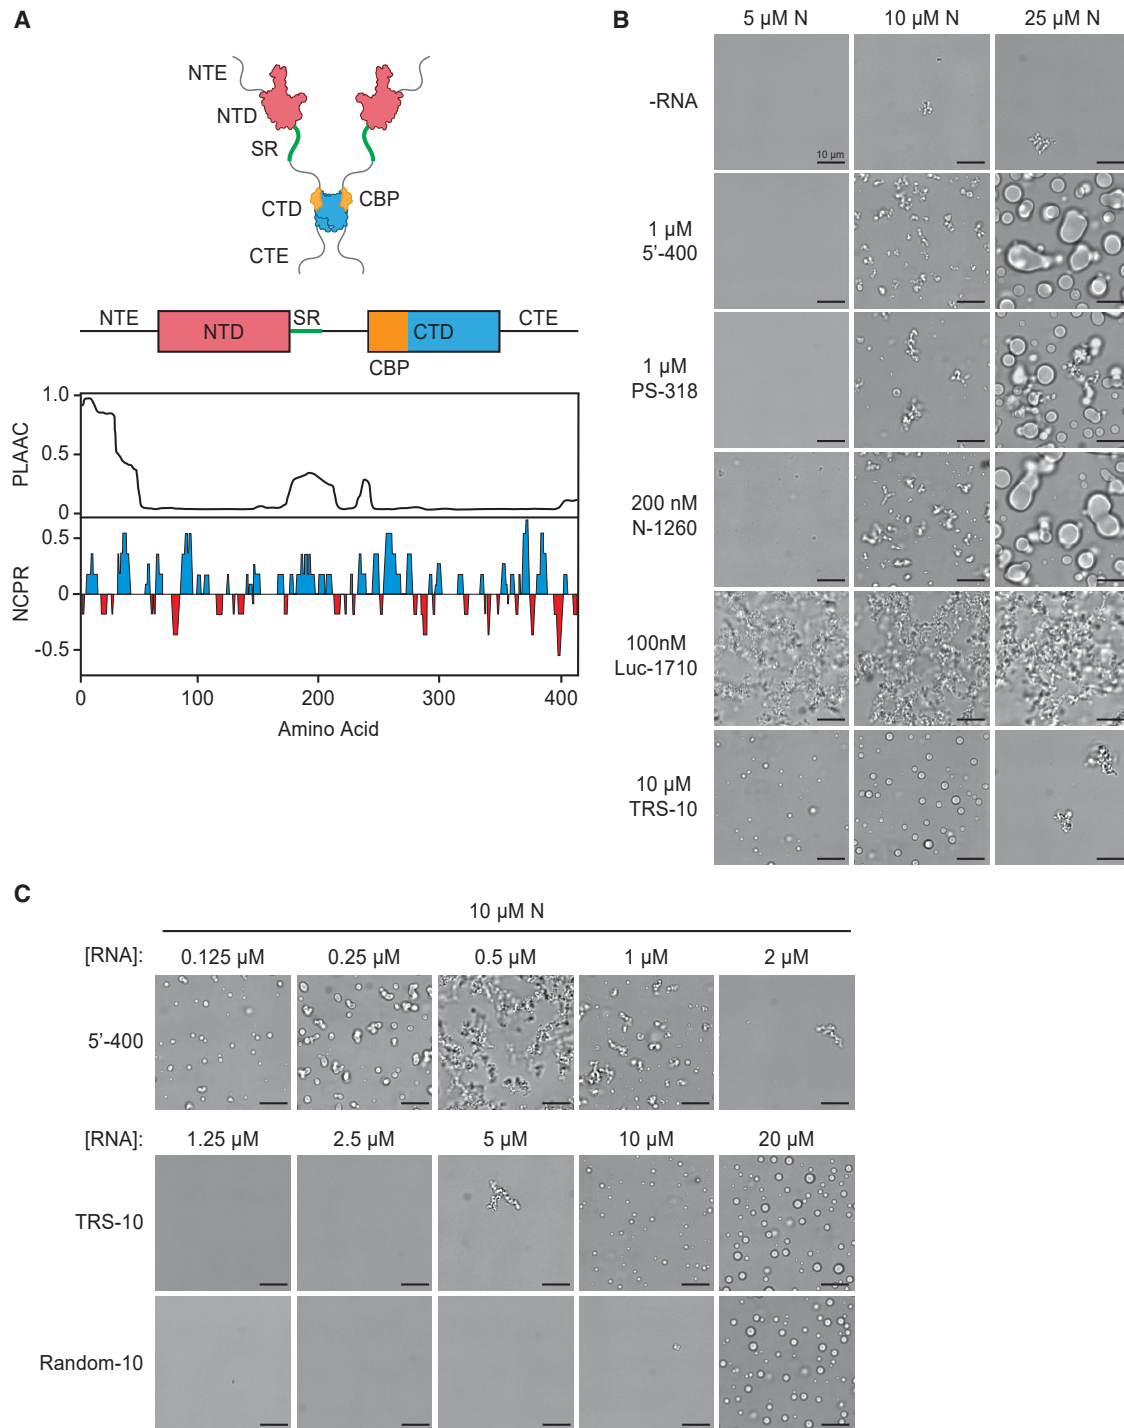

**Figure 1. SARS-CoV-2 N Protein Forms Biomolecular Condensates in the Presence of RNA**

(A) Top: schematic of N protein domain architecture. NTE, N-terminal extension; NTD, N-terminal domain; SR, SR region; CTD, C-terminal domain; CTE, C-terminal extension; CBP, CTD basic patch. Bottom: features of amino acid sequence. PLAAC, prion-like amino acid composition (Lancaster et al., 2014); NCPR, net charge per residue. See Figure S1 for sequence.

(B) Light microscopy images of N protein condensates after a 30-min incubation at room temperature with the indicated RNA molecules. All images are representative of multiple independent experiments; scale bar, 10  $\mu$ m.

(C) Condensate formation by N protein (10  $\mu$ M) over a range of 5'-400, TRS-10, and Random-10 RNA concentrations. All images are representative of multiple independent experiments; scale bar, 10  $\mu$ m. Random-10 RNA is a mixed population of 10-nt random sequences. See Figure S3 for condensate formation at other N protein and 5'-400 RNA concentrations.

concentrations, suggesting that specific binding is not entirely responsible for the effects of TRS RNA (Figure 1C). We speculate that the binding of a short RNA molecule alters N protein structure to promote low-affinity protein-protein interactions leading to droplet formation. In the more physiologically relevant context of long RNAs, these weak protein-protein interactions are presumably augmented by multivalent RNA-protein interactions.

We next explored the roles of N protein disordered regions. We analyzed mutant proteins lacking the following regions (Figure 2A; Figure S1): (1) the 44-aa N-terminal extension (NTE), a poorly conserved prion-like sequence with a basic cluster that contributes to RNA binding (Chang et al., 2009); (2) the 31-aa SR region, a basic segment implicated in RNA binding, oligomerization (Luo et al., 2005), and phosphorylation (Bouhaddou et al., 2020; Davidson et al., 2020; Fung and Liu, 2018; Klann et al., 2020; Peng et al., 2008; Stohman et al., 1983; Surjit et al., 2005; White et al., 2007; Wu et al., 2014; Wu et al., 2009); (3) the 55-aa C-terminal extension (CTE), implicated in oligomerization (Hurst et al., 2009; Luo et al., 2006; Luo et al., 2005; Ye et al., 2020); and (4) the CTD basic patch (CBP), a 33-aa basic region that forms the RNA-binding groove on the surface of the CTD (Chen et al., 2007; Takeda et al., 2008; Ye et al., 2020), which can be deleted without affecting CTD dimer structure (Yu et al., 2006).

When combined with viral 5'-400 RNA, none of the deletions completely prevented droplet formation at high protein concentrations (Figure 2A), indicating that no single disordered segment is essential for the interactions that mediate droplet formation. CTE deletion stimulated the formation of abundant filaments, suggesting that this region normally inhibits certain interactions. Deletion of the NTE or CBP abolished filaments. Droplets were also observed after deletion of both the NTE and CTE, showing that the central regions are sufficient for droplet formation. Turbidity analyses (Figure 2B) showed that full-length N protein structures increased abruptly between 5 and 10  $\mu$ M, supporting a cooperative mechanism of oligomer assembly. Consistent with the microscopy analyses, CTE deletion reduced the saturating concentration and NTE deletion increased it, further supporting the negative and positive roles, respectively, of these regions. Deletion of both the NTE and CTE resulted in an intermediate phenotype (Figure 2B).

Further insights arose in studies of deletion mutants and the 10-nt TRS RNA (Figure 2A). By minimizing the contribution of multivalent RNA binding, these studies illuminated critical protein-protein interactions that contribute to condensate formation. As in the experiments with long RNA, CTE deletion enhanced droplet formation, NTE deletion inhibited it, and the double deletion had little effect, pointing to these regions as opposing but nonessential modulators of protein-protein interactions. As in the wild-type protein (Figure 1B), a molar excess of N protein suppressed droplet formation by TRS RNA in most mutants; only the CBP deletion caused abundant droplets when the protein was in excess of RNA, suggesting that the CBP is responsible for the reduced droplet formation seen with high N protein concentrations. In contrast to results with long RNA, deletion of the SR region abolished TRS-mediated condensates (Figure 2A). TRS binding to the NTD is known to be enhanced by the basic SR region, but SR deletion has only a moderate impact

on affinity (Grossoehme et al., 2009). At the RNA concentration used in our experiments, it is unlikely that SR deletion abolished RNA binding. We therefore suspect that the SR region, perhaps in association with part of the RNA, is required for TRS-dependent droplet formation because it mediates a weak interaction with another N protein (Luo et al., 2005).

### Phosphorylation Promotes More Liquid-like N Protein Condensates

N protein phosphorylation depends on a poorly understood collaboration between multiple kinases (Peng et al., 2008; Surjit et al., 2005; Wu et al., 2014; Wu et al., 2009). One important player is the abundant cytoplasmic kinase GSK-3, which generally phosphorylates serines or threonines four residues upstream of pre-phosphorylated "priming" sites (Beurel et al., 2015). Studies of the N protein of SARS-CoV (Wu et al., 2009) support the presence of two priming sites, P1 and P2 (Figure 3A), where phosphorylation initiates a series of GSK-3-mediated phosphorylation events, each primed by the previous site, resulting in a high density of up to ten phosphates. The kinases responsible for priming phosphorylation are not known, but the P2 site (S206 in SARS-CoV-2) is a strong consensus sequence (S/T-P-x-K/R) for Cdk1, a major cell cycle kinase (Morgan, 1997; Surjit et al., 2005).

To produce phosphorylated N protein, we first tested the possibility that Cdk1 primes the protein for subsequent phosphorylation by GSK-3. We found that Cdk1-cyclin B1 phosphorylated N protein in the SR region and mutation of S206 reduced Cdk1-dependent phosphorylation (Figure 3B). Phosphorylation might also occur at T198, a nearby Cdk1 consensus site. A combination of Cdk1 and GSK-3 enhanced phosphorylation. Clear evidence for priming by Cdk1 was obtained by extensive unlabeled phosphorylation by Cdk1, followed by analysis of radiolabeled phosphorylation with GSK-3 (Figure 3C).

Phosphorylation of N protein with a combination of Cdk1 and GSK-3 reduced filamentous structures and promoted the formation of more spherical droplets (Figure 3D). GSK-3 alone had no effect, whereas Cdk1 alone promoted droplets to a small extent. Phosphorylation in the SR region therefore appears to promote the formation of more liquid-like condensates.

We explored the role of phosphorylation in depth with studies of a phosphomimetic mutant in which the ten serines and threonines in the SR region were replaced with aspartate (the 10D mutant). When combined with the 5'-400 viral RNA, the 10D protein rapidly formed condensates with a spherical droplet morphology that was clearly distinct from the filamentous structures of the wild-type protein (Figure 3E). The droplets seen with the 10D mutant were more spherical and uniform than those observed following phosphorylation *in vitro* (Figure 3D), presumably because phosphorylation at all sites is unlikely to be achieved *in vitro*. All three viral RNAs were effective in driving droplet formation, although N-1260 appeared to reduce the saturating concentration (Figure S4A). NTE deletion in the 10D protein reduced droplet formation, showing once again the positive role of this region (Figure 3F).

Importantly, the 10D mutation had a greater impact on condensate morphology (Figure 3E) than an SR deletion (Figure 2A), indicating that phosphorylation does not simply block

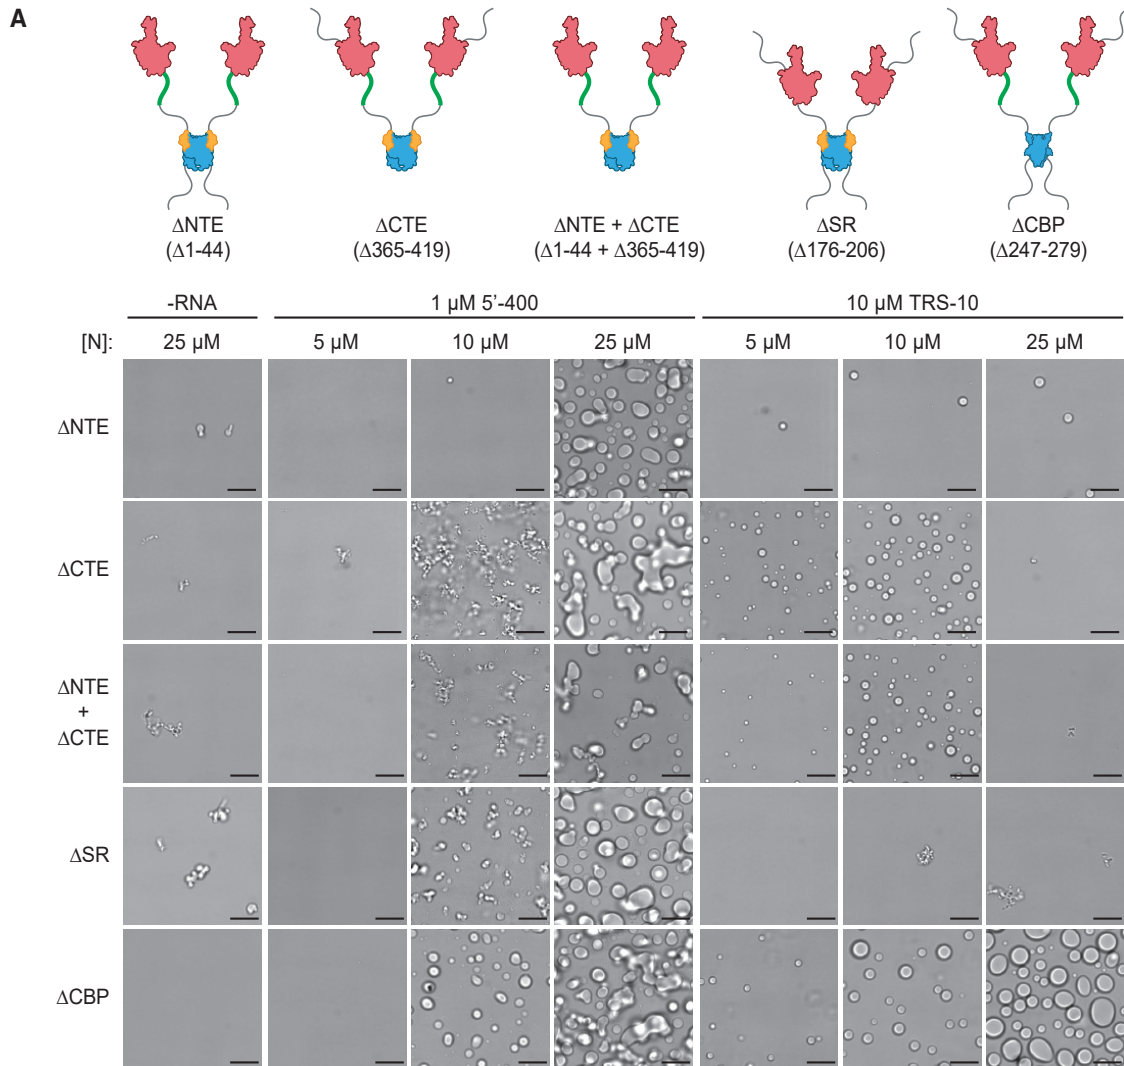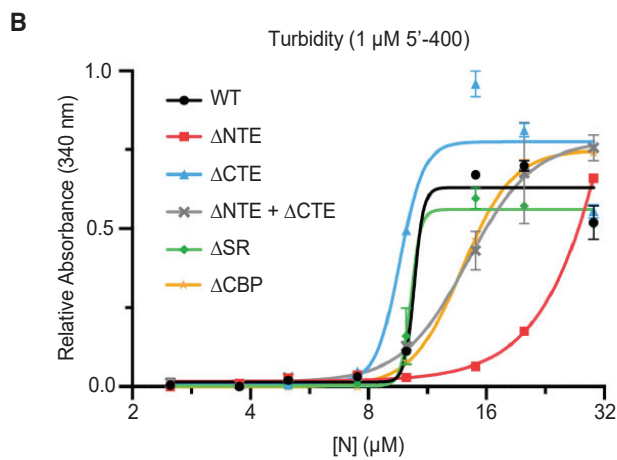

(legend on next page)

SR function but might also interfere with other interactions. One plausible possibility, for example, is that the abundant negative charge of the phosphorylated SR region interacts intramolecularly with one or more of the positively charged patches on the adjacent NTD or CTD, thereby interfering with multivalent RNA-protein interactions.

Droplet formation by TRS RNA was abolished in the 10D mutant (Figure 3E), just as we observed with TRS RNA and the SR deletion (Figure 2A). These results support the notion that phosphorylation blocks weak protein-protein interactions mediated by the SR region.

Phosphorylated N protein is thought to be localized at the RTC (Stohlman et al., 1983). The N protein of mouse hepatitis virus (MHV) is known to interact directly with the N-terminal Ubl1 domain of Nsp3, a large transmembrane protein localized to RTC membranes (Cong et al., 2020; Hurst et al., 2013; Hurst et al., 2010; Keane and Giedroc, 2013). We found that a GFP-tagged Ubl1 domain of SARS-CoV-2 Nsp3 partitioned into N protein droplets and filamentous structures (Figure S4B), providing a potential mechanism for association of the RTC with N protein condensates.

To gain a better understanding of the properties of N protein structures, we analyzed the fusion dynamics of different structures over time. During a short (90 s) time course, the filamentous structures of 10  $\mu$ M wild-type protein remained immobile and did not fuse, while the spherical droplets of the 10D mutant were highly dynamic and fused rapidly (Figure 4A). We also found that the droplet-like structures at higher concentrations of unmodified protein displayed relatively slow fusion activity compared to the droplets of phosphorylated N protein (Figure 4B). These results suggest that unmodified protein forms gel-like condensates that are relatively rigid, while phosphorylated N protein forms condensates that behave more like liquid droplets.

We analyzed condensate properties further by labeling N protein with a fluorescent dye, incubating 20  $\mu$ M N protein with 5'-400 RNA to form droplets, and measuring fluorescence recovery after photobleaching (FRAP). Wild-type N protein droplets recovered slowly (about 7% over 4 min), and recovery was most apparent at the edges of the droplets (Figures 4C and S4C). 10D mutant droplets recovered more uniformly and about 2-fold more rapidly (12% over 4 min), suggesting that phosphorylation generates a more dynamic condensate but also showing that both wild-type and 10D condensates are less dynamic *in vitro* than many previously described condensates.

We used negative-stain electron microscopy to further analyze mixtures of 10  $\mu$ M N protein and 1  $\mu$ M viral RNA (Figure 4D). Unmodified wild-type protein and PS-318 RNA formed particles of  $\sim$ 15 nm diameter, and two-dimensional classification of these particles revealed a uniform size and architecture (Figure 4E). Similar particles were observed with 5'-400 RNA (Figure S4D). Thus, the gel-like filamentous condensates of the unmodified

protein—and possibly the nucleocapsid—are likely to be assembled on a foundation of discrete structural building blocks. In contrast, the mixture of 10D mutant and RNA formed nonuniform, poorly defined chains (Figure 4D), suggesting that phosphorylation disrupts the structural units of the unmodified protein to create a more diffuse, liquid-like condensate.

## DISCUSSION

We conclude that the N protein of SARS-CoV-2, together with viral RNA, assembles into multiple structural forms that depend on a complex blend of intramolecular and intermolecular interactions. The more rigid filamentous condensates of the unmodified protein most likely depend on high-avidity interactions mediated by multivalent RNA-protein, RNA-RNA, and protein-protein interactions. The latter might include prion-like interactions between NTEs, binding of the SR region to the CTD (Luo et al., 2005), or helical CTD polymers that depend on the CBP (Chen et al., 2007; Gui et al., 2017). Long RNAs augment these protein-protein interactions by interacting with the numerous RNA-binding sites on the protein. Our results also support a model in which phosphorylation of the SR region blocks SR-mediated protein-protein interactions and interferes intramolecularly with RNA binding at other sites, resulting in a loss of affinity that generates a more dynamic liquid droplet.

The different forms of N protein oligomers seem well suited for its two major functions. In the nucleocapsid, where extremely compact RNA packaging is the goal, the organized structures of the unmodified protein could represent an underlying structural framework that is supplemented by liquid-like condensation—much like chromosome packaging depends on underlying nucleosome structure and the condensate behavior of chromatin proteins (Larson et al., 2017; Larson and Narlikar, 2018). Consistent with this possibility, the ribonucleoprotein particles we observed with unmodified N protein and viral RNA are remarkably similar in size and shape to nucleocapsid particles seen in electron microscopy and tomography studies of partially disrupted MHV nucleocapsids (Gui et al., 2017) and SARS-CoV-2 virions (Klein et al., 2020; Yao et al., 2020).

The more liquid-like behavior of phosphorylated N protein condensates might be particularly important at the RTC. There is abundant evidence linking N protein phosphorylation with localization and function in the RTC. N protein is fully phosphorylated soon after synthesis and rapidly associates with large membrane structures that presumably represent the RTC (Stohlman et al., 1983). N protein is the only viral structural protein that localizes to the RTC (Snijder et al., 2020; V'kovski et al., 2019), and immunoelectron microscopy reveals high concentrations of N protein in electron-dense regions adjacent to the double-membrane vesicles and convoluted membranes of the RTC (Snijder et al., 2020; Stertz et al., 2007; Ulasli et al., 2010). At these sites, N protein co-localizes with the transmembrane viral protein Nsp3,

### Figure 2. Disordered Regions Modulate N Protein Condensate Formation

(A) Top: schematics of N protein deletion mutants. Bottom: N protein condensates observed in the presence of 5'-400 RNA or TRS-10 RNA after a 30-min incubation at room temperature. Images are representative of multiple independent experiments. Scale bar, 10  $\mu$ m.  
(B) Absorbance at 340 nm was used to quantify the turbidity of N protein mixtures after a 15-min incubation at room temperature with 1  $\mu$ M 5'-400. Data points indicate mean  $\pm$  SEM of duplicates; representative of two independent experiments.

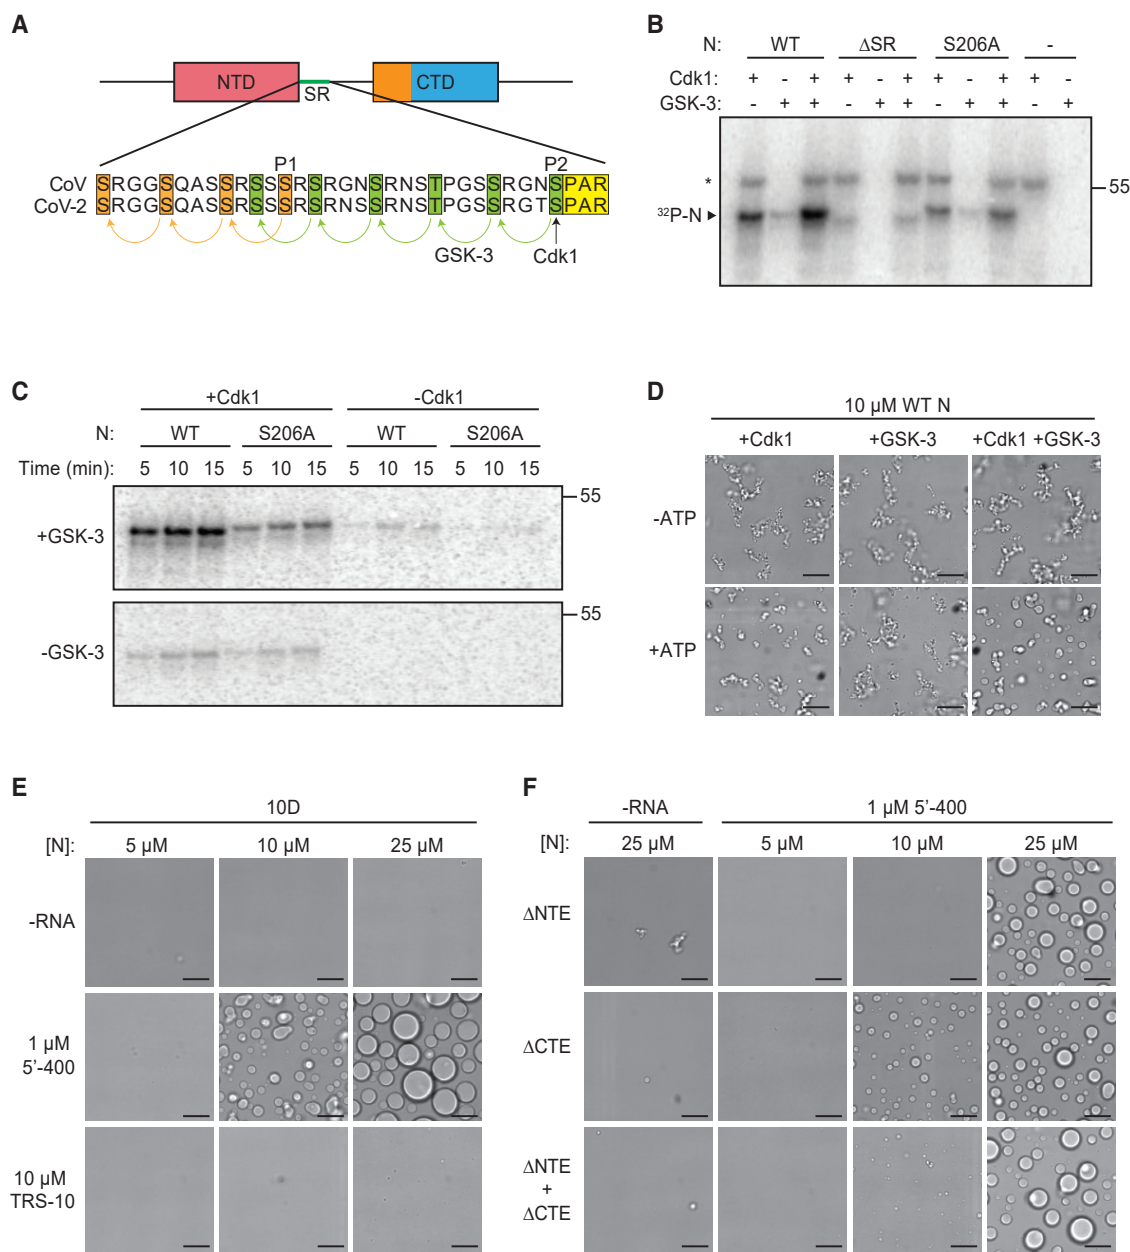

**Figure 3. Phosphorylation Modulates N Protein Condensate Properties**

(A) Sequences of the SR regions of SARS-CoV N protein (aa 177–210) and SARS-CoV-2 N protein (aa 176–209). Proposed priming sites (P1 and P2) for GSK-3 are indicated (Wu et al., 2009). P2 (S206 in SARS-CoV-2) is a Cdk consensus site (yellow) where phosphorylation is thought to prime sequential phosphorylation (arrows) of five upstream sites (green) by GSK-3. P1 phosphorylation by an unknown kinase primes phosphorylation at three upstream sites (orange).

(B) The indicated N protein variants were incubated for 30 min with Cdk1-cyclin B1 and/or GSK-3 and radiolabeled ATP, and reaction products were analyzed by SDS-PAGE and autoradiography. Radiolabeled N protein is indicated. Asterisk indicates cyclin B1 autophosphorylation. Molecular weight marker shown on the right (kDa).

(C) N protein was incubated overnight with unlabeled ATP and Cdk1-cyclin B1 (left lanes) or no kinase (right lanes), desalted, and incubated with or without GSK-3 and radiolabeled ATP. Reaction products were analyzed by SDS-PAGE and autoradiography. Molecular weight marker shown on the right (kDa).

(D) 10 μM N protein was incubated 2 h with Cdk1-cyclin B1 and GSK-3 in the presence or absence of ATP, dialyzed into droplet buffer overnight, and mixed with 1 μM 5'-400 RNA. After 30 min, N protein condensates were analyzed by light microscopy.

(E) Images of N protein 10D mutant following 30-min incubation with or without 1 μM 5'-400 or 10 μM TRS-10 RNA.

(F) Images of 10D mutants with the indicated deletions, incubated with or without 1 μM 5'-400 RNA.

(B–F) All results are representative of multiple independent experiments; scale bar, 10 μm.



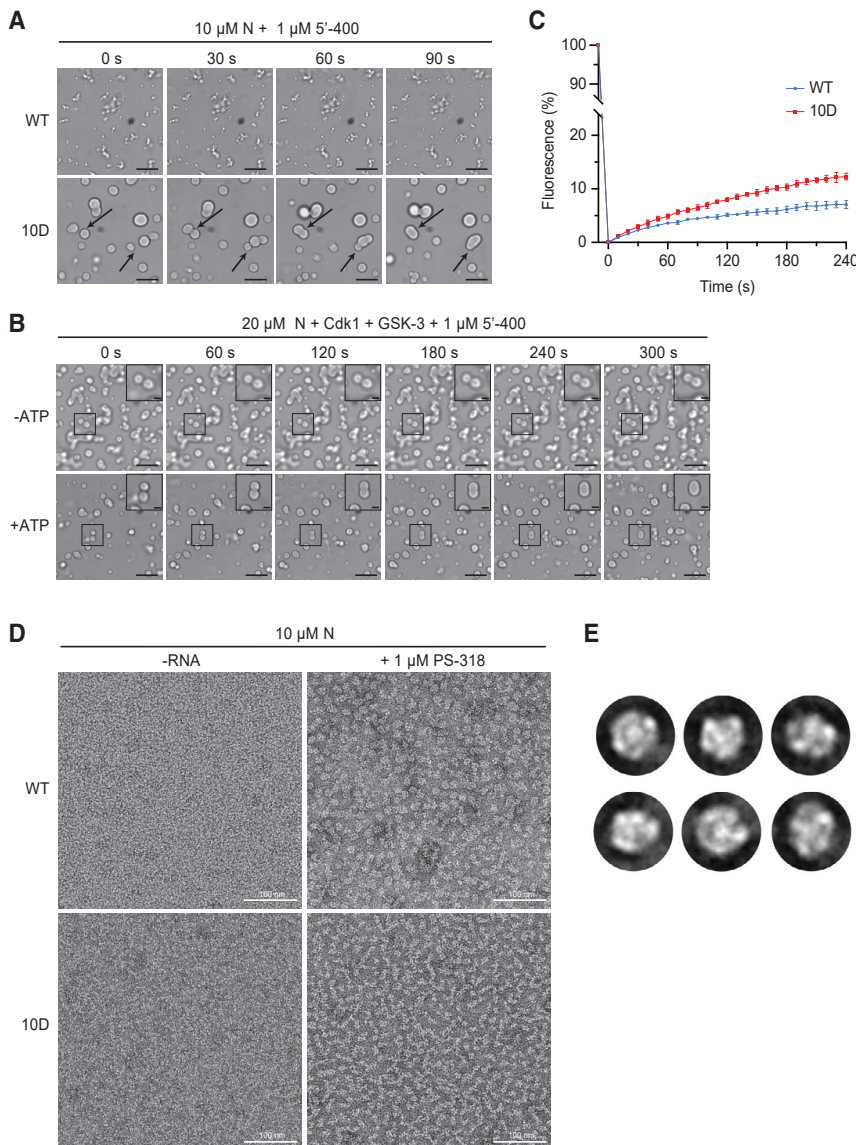

**Figure 4. Phosphorylation of N Protein Promotes Liquid-like Behavior**

(A) N protein (10  $\mu\text{M}$  wild-type [WT] or 10D) was mixed with 1  $\mu\text{M}$  5'-400 RNA for 20 min, and images were taken at 30-s intervals. Arrows indicate droplet fusion events in the 10D mutant. No fusion events were observed in WT structures.

(B) 20  $\mu\text{M}$  N protein was phosphorylated with Cdk1-cyclin B1 and GSK-3 as in Figure 3D, incubated with 1  $\mu\text{M}$  5'-400 RNA for 20 min, and imaged every 60 s. Representative droplet fusion events are boxed with higher magnification images in insets at upper right. Images are representative of multiple independent experiments; scale bar, 10  $\mu\text{m}$  (2  $\mu\text{m}$  for insets).

(C) FRAP analysis of droplets formed with 20  $\mu\text{M}$  dye-labeled N protein (WT or 10D) and 1  $\mu\text{M}$  5'-400 RNA. Following 30 s of bleaching, droplet fluorescence was measured starting at time zero. Data points indicate mean fluorescence intensity as a percentage of pre-bleaching intensity (mean  $\pm$  SEM,  $n = 2$  for WT and  $n = 3$  for 10D). Note the break in the y axis to allow better viewing of recovery data. Results are representative of two independent experiments. See Figure S4C for images.

(D) 10  $\mu\text{M}$  N protein (WT or 10D) was incubated without or with 1  $\mu\text{M}$  PS-318 RNA for 15 min prior to analysis by negative-stain electron microscopy. Images are representative of three independent experiments. Scale bar, 100 nm.

(E) 2D class averages of particles from the EM analysis of WT N protein and RNA in (D). Particle selection was not possible with the nonuniform structures formed by the 10D mutant.

which is known to bind N protein and might therefore anchor N protein oligomers to RTC membranes (Cong et al., 2020; Hurst et al., 2013; Hurst et al., 2010; Keane and Giedroc, 2013; Wolff et al., 2020) (Figure S4B). In light microscopy of infected cells, GFP-tagged N protein forms large cytoplasmic granules that colocalize with Nsp3 at RTCs (Bost et al., 2000; Cong et al., 2020; Stertz et al., 2007; Verheije et al., 2008), and FRAP indicates that N protein is dynamically associated with these granules (Verheije et al., 2010). N protein helps control subgenomic transcription in the RTC, and inhibition of phosphorylation blocks this function (Almazán et al., 2004; Wu et al., 2014; Zúñiga et al., 2010). With these many lines of evidence in mind, our work points to the possibility that a condensate of phosphorylated N protein and loosely bound RNA, linked to RTC membranes by Nsp3, provides a compartment to concentrate and protect the viral replication and transcription machinery. Similar mechanisms are likely to exist in negative-sense RNA viruses, where replication is focused

in dynamic biomolecular condensates (Heinrich et al., 2018; Nevers et al., 2020; Nikolic et al., 2017; Zhou et al., 2019). In measles virus, these condensates have also been implicated in nucleocapsid assembly (Guseva et al., 2020).

Others have also observed recently that the N protein of SARS-CoV-2 forms RNA-dependent biomolecular condensates *in vitro* (Chen et al., 2020; Cubuk et al., 2020; Iserman et al., 2020; Jack et al., 2020; Lu et al., 2020; Perdikari et al., 2020; Savastano et al., 2020). When overexpressed at high levels in uninfected cells, the N proteins of MHV (Verheije et al., 2008), SARS-CoV (Peng et al., 2008), and SARS-CoV-2 (Iserman et al., 2020; Lu et al., 2020) form cytoplasmic granules. In the case of SARS-CoV-2 N protein, these granules display the fusion and rapid turnover behaviors of dynamic condensates (Iserman et al., 2020; Lu et al., 2020). Most importantly, as mentioned above, the granules of N protein that form at the RTC in infected cells also display rapid turnover (Verheije et al., 2010).

FRAP reveals that N protein granules in the cell turn over much more rapidly than N protein condensates *in vitro* (Figure 4C) (Iserman et al., 2020; Lu et al., 2020; Verheije et al., 2010). Phosphorylation *in vivo* does not entirely explain this discrepancy as we found that the 10D mutant still displays relatively slow turnover.

We speculate that N protein dynamics in the cell, and particularly in the infected cell, are further governed by cellular and viral proteins and RNA.

There is some evidence to suggest a link between N protein and stress granules, the cytoplasmic mRNA-protein condensates that form in response to translation arrest and contribute to the response to some viral infections (Cascarina and Ross, 2020; McCormick and Khapersky, 2017; Protter and Parker, 2016; Tsai and Lloyd, 2014). In uninfected cells, overexpressed N protein of SARS-CoV (Peng et al., 2008) or SARS-CoV-2 (Savastano et al., 2020) associates with stress granules, and N protein associates *in vitro* with condensates of stress granule proteins (Perdikari et al., 2020). Recent proteomic analyses indicate that the N protein of SARS-CoV-2, when expressed in uninfected cells, associates with proteins found in stress granules (Gordon et al., 2020; Li et al., 2020; Samavarchi-Tehrani et al., 2020; Stukalov et al., 2020) and appears to suppress stress granule formation (Nabeel-Shah et al., 2020; Samavarchi-Tehrani et al., 2020). Studies of infected cells will be required, however, to determine if stress granules form during SARS-CoV-2 infection and whether N protein has any role in their regulation.

Consistent with our results, N protein granules in MHV-infected cells display dramatic changes in morphology following chemical inhibition of GSK-3 kinase activity (Wu et al., 2014). Most importantly, GSK-3 inhibition disrupts MHV genome processing and reduces the production of virions by MHV- or SARS-CoV-infected cells (Wu et al., 2014; Wu et al., 2009). Cdk inhibitors inhibit virus production by SARS-CoV-2-infected cells (Bouhaddou et al., 2020). Viral replication is also reduced by inhibition of the kinases SRPK1 and 2, which have also been implicated in N protein phosphorylation (Heaton et al., 2020; Nikolakaki and Giannakouros, 2020; Peng et al., 2008). Thus, chemical inhibitors of kinases that phosphorylate the N protein have the potential to serve as antiviral therapies in the early stages of COVID-19.

### Limitations

Our studies focused on the behavior of purified N protein *in vitro* when mixed with fragments of the viral RNA genome. As in all studies of purified components, it is not yet clear that the interesting behaviors we observe are relevant to N protein function in the infected cell, where numerous host and viral proteins and RNAs are likely to comingle with N protein at the RTC and at viral packaging sites. It is also possible that phosphoregulation of the N protein in the cell is complex and that specific sites and kinases play more nuanced roles in the control of N protein interactions with itself and other components. The resolution of these questions will require detailed microscopic and biochemical analyses of N protein behavior, viral genome transcription, and viral packaging in cells infected with wild-type SARS-CoV-2 or with viruses bearing mutations in phosphorylation sites or other sites that modulate condensate behavior.

### STAR★METHODS

Detailed methods are provided in the online version of this paper and include the following:

- **KEY RESOURCES TABLE**
- **RESOURCE AVAILABILITY**
  - Lead Contact
  - Materials Availability
  - Data and Code Availability
- **EXPERIMENTAL MODEL AND SUBJECT DETAILS**
- **METHOD DETAILS**
  - Plasmid construction and RNA preparation
  - Protein purification
  - Light microscopy
  - Turbidity analysis
  - Kinase reactions
  - Fluorescence recovery after photobleaching (FRAP)
  - Electron microscopy
- **QUANTIFICATION AND STATISTICAL ANALYSIS**
  - Turbidity Analysis
  - Fluorescence recovery after photobleaching

### SUPPLEMENTAL INFORMATION

Supplemental Information can be found online at <https://doi.org/10.1016/j.molcel.2020.11.025>.

### ACKNOWLEDGMENTS

We thank Geeta Narlikar, Sy Redding, and Adam Frost for valuable discussions; Madeline Keenen and Emily Wong for biochemical reagents and technical advice; and Delaine Larsen and So Yeon Kim of the UCSF Nikon Imaging Center for assistance with FRAP microscopy. This work was supported by the National Institute of General Medical Sciences, United States (R35-GM118053) and the UCSF Program for Breakthrough Biomedical Research, which is funded in part by the Sandler Foundation, United States.

### AUTHOR CONTRIBUTIONS

C.R.C., J.B.A., C.M.G., C.J.H., N.H., and M.S. contributed to conceptualization, experimental design, and generation of results; C.R.C. prepared proteins and performed microscopy analysis of condensates; J.B.A. and C.M.G. prepared proteins and performed kinase experiments; C.J.H. performed EM analysis; N.H. performed FRAP analysis; M.S. assisted with protein expression and microscopy with guidance from A.D.F.; and D.O.M. provided guidance and wrote the paper with contributions from all authors.

### DECLARATION OF INTERESTS

The authors declare no competing interests.

Received: July 5, 2020

Revised: October 2, 2020

Accepted: November 10, 2020

Published: November 20, 2020

### REFERENCES

- Alberti, S., Gladfelter, A., and Mittag, T. (2019). Considerations and Challenges in Studying Liquid-Liquid Phase Separation and Biomolecular Condensates. *Cell* 176, 419–434.
- Almazán, F., Galán, C., and Enjuanes, L. (2004). The nucleoprotein is required for efficient coronavirus genome replication. *J. Virol.* 78, 12683–12688.
- Banani, S.F., Lee, H.O., Hyman, A.A., and Rosen, M.K. (2017). Biomolecular condensates: organizers of cellular biochemistry. *Nat. Rev. Mol. Cell Biol.* 18, 285–298.
- Beurel, E., Grieco, S.F., and Jope, R.S. (2015). Glycogen synthase kinase-3 (GSK3): regulation, actions, and diseases. *Pharmacol. Ther.* 148, 114–131.

- Bost, A.G., Carnahan, R.H., Lu, X.T., and Denison, M.R. (2000). Four proteins processed from the replicase gene polyprotein of mouse hepatitis virus colocalize in the cell periphery and adjacent to sites of virion assembly. *J. Virol.* **74**, 3379–3387.
- Bouhaddou, M., Memon, D., Meyer, B., White, K.M., Rezelj, V.V., Correa Marrero, M., Polacco, B.J., Melnyk, J.E., Ulferts, S., Kaake, R.M., et al. (2020). The Global Phosphorylation Landscape of SARS-CoV-2 Infection. *Cell* **182**, 685–712.e19.
- Cascarina, S.M., and Ross, E.D. (2020). A proposed role for the SARS-CoV-2 nucleocapsid protein in the formation and regulation of biomolecular condensates. *FASEB J.* <https://doi.org/10.1096/fj.202001351>.
- Chang, C.K., Hsu, Y.L., Chang, Y.H., Chao, F.A., Wu, M.C., Huang, Y.S., Hu, C.K., and Huang, T.H. (2009). Multiple nucleic acid binding sites and intrinsic disorder of severe acute respiratory syndrome coronavirus nucleocapsid protein: implications for ribonucleocapsid protein packaging. *J. Virol.* **83**, 2255–2264.
- Chang, C.K., Chen, C.M., Chiang, M.H., Hsu, Y.L., and Huang, T.H. (2013). Transient oligomerization of the SARS-CoV N protein—implication for virus ribonucleoprotein packaging. *PLoS ONE* **8**, e65045.
- Chang, C.K., Hou, M.H., Chang, C.F., Hsiao, C.D., and Huang, T.H. (2014). The SARS coronavirus nucleocapsid protein—forms and functions. *Antiviral Res.* **103**, 39–50.
- Chen, S.C., and Olsthoorn, R.C. (2010). Group-specific structural features of the 5'-proximal sequences of coronavirus genomic RNAs. *Virology* **401**, 29–41.
- Chen, C.Y., Chang, C.K., Chang, Y.W., Sue, S.C., Bai, H.I., Riang, L., Hsiao, C.D., and Huang, T.H. (2007). Structure of the SARS coronavirus nucleocapsid protein RNA-binding dimerization domain suggests a mechanism for helical packaging of viral RNA. *J. Mol. Biol.* **368**, 1075–1086.
- Chen, H., Cui, Y., Han, X., Hu, W., Sun, M., Zhang, Y., Wang, P.H., Song, G., Chen, W., and Lou, J. (2020). Liquid-liquid phase separation by SARS-CoV-2 nucleocapsid protein and RNA. *Cell Res.* <https://doi.org/10.1038/s41422-020-00408-2>.
- Cong, Y., Kriegenburg, F., de Haan, C.A.M., and Reggiori, F. (2017). Coronavirus nucleocapsid proteins assemble constitutively in high molecular oligomers. *Sci. Rep.* **7**, 5740.
- Cong, Y., Ulasli, M., Schepers, H., Mauthe, M., V'kovski, P., Kriegenburg, F., Thiel, V., de Haan, C.A.M., and Reggiori, F. (2020). Nucleocapsid Protein Recruitment to Replication-Transcription Complexes Plays a Crucial Role in Coronavirus Life Cycle. *J. Virol.* **94**, e01925-19.
- Cubuk, J., Alston, J.J., Incicco, J.J., Singh, S., Stuchell-Breton, M.D., Ward, M.D., Zimmerman, M.I., Vithani, N., Griffith, D., Wagoner, J.A., et al. (2020). The SARS-CoV-2 nucleocapsid protein is dynamic, disordered, and phase separates with RNA. *bioRxiv.* 2020.06.17.158121. <https://doi.org/10.1101/2020.06.17.158121>.
- Davidson, A.D., Williamson, M.K., Lewis, S., Shoemark, D., Carroll, M.W., Heesom, K.J., Zambon, M., Ellis, J., Lewis, P.A., Hiscox, J.A., and Matthews, D.A. (2020). Characterisation of the transcriptome and proteome of SARS-CoV-2 reveals a cell passage induced in-frame deletion of the furin-like cleavage site from the spike glycoprotein. *Genome Med.* **12**, 68.
- den Boon, J.A., and Ahlquist, P. (2010). Organelle-like membrane compartmentalization of positive-strand RNA virus replication factories. *Annu. Rev. Microbiol.* **64**, 241–256.
- Desai, D., Gu, Y., and Morgan, D.O. (1992). Activation of human cyclin-dependent kinases in vitro. *Mol. Biol. Cell* **3**, 571–582.
- Fan, H., Ooi, A., Tan, Y.W., Wang, S., Fang, S., Liu, D.X., and Lescar, J. (2005). The nucleocapsid protein of coronavirus infectious bronchitis virus: crystal structure of its N-terminal domain and multimerization properties. *Structure* **13**, 1859–1868.
- Fung, T.S., and Liu, D.X. (2018). Post-translational modifications of coronavirus proteins: roles and function. *Future Virol.* **13**, 405–430.
- Fung, T.S., and Liu, D.X. (2019). Human Coronavirus: Host-Pathogen Interaction. *Annu. Rev. Microbiol.* **73**, 529–557.
- Gordon, D.E., Jang, G.M., Bouhaddou, M., Xu, J., Obernier, K., White, K.M., O'Meara, M.J., Rezelj, V.V., Guo, J.Z., Swaney, D.L., et al. (2020). A SARS-CoV-2 protein interaction map reveals targets for drug repurposing. *Nature* **583**, 459–468.
- Grossoehme, N.E., Li, L., Keane, S.C., Liu, P., Dann, C.E., 3rd, Leibowitz, J.L., and Giedroc, D.P. (2009). Coronavirus N protein N-terminal domain (NTD) specifically binds the transcriptional regulatory sequence (TRS) and melts TRS-cTRS RNA duplexes. *J. Mol. Biol.* **394**, 544–557.
- Gui, M., Liu, X., Guo, D., Zhang, Z., Yin, C.C., Chen, Y., and Xiang, Y. (2017). Electron microscopy studies of the coronavirus ribonucleoprotein complex. *Protein Cell* **8**, 219–224.
- Guseva, S., Milles, S., Jensen, M.R., Salvi, N., Kleman, J.P., Maurin, D., Ruigrok, R.W.H., and Blackledge, M. (2020). Measles virus nucleocapsid and phosphoproteins form liquid-like phase-separated compartments that promote nucleocapsid assembly. *Sci. Adv.* **6**, eaaz7095.
- Hagemeyer, M.C., Rottier, P.J., and de Haan, C.A. (2012). Biogenesis and dynamics of the coronavirus replicative structures. *Viruses* **4**, 3245–3269.
- He, R., Dobie, F., Ballantine, M., Leeson, A., Li, Y., Bastien, N., Cutts, T., Andonov, A., Cao, J., Booth, T.F., et al. (2004). Analysis of multimerization of the SARS coronavirus nucleocapsid protein. *Biochem. Biophys. Res. Commun.* **316**, 476–483.
- Heaton, B.E., Trimarco, J.D., Hamele, C.E., Harding, A.T., Tata, A., Zhu, X., Tata, P.R., Smith, C.M., and Heaton, N.S. (2020). SRSF protein kinases 1 and 2 are essential host factors for human coronaviruses including SARS-CoV-2. *bioRxiv.* 2020.08.14.251207. <https://doi.org/10.1101/2020.08.14.251207>.
- Heinrich, B.S., Maliga, Z., Stein, D.A., Hyman, A.A., and Whelan, S.P.J. (2018). Phase Transitions Drive the Formation of Vesicular Stomatitis Virus Replication Compartments. *MBio* **9**, e02290-17.
- Hsieh, P.K., Chang, S.C., Huang, C.C., Lee, T.T., Hsiao, C.W., Kou, Y.H., Chen, I.Y., Chang, C.K., Huang, T.H., and Chang, M.F. (2005). Assembly of severe acute respiratory syndrome coronavirus RNA packaging signal into virus-like particles is nucleocapsid dependent. *J. Virol.* **79**, 13848–13855.
- Huang, Q., Yu, L., Petros, A.M., Gunasekera, A., Liu, Z., Xu, N., Hajduk, P., Mack, J., Fesik, S.W., and Olejniczak, E.T. (2004). Structure of the N-terminal RNA-binding domain of the SARS CoV nucleocapsid protein. *Biochemistry* **43**, 6059–6063.
- Hurst, K.R., Koetzner, C.A., and Masters, P.S. (2009). Identification of in vivo-interacting domains of the murine coronavirus nucleocapsid protein. *J. Virol.* **83**, 7221–7234.
- Hurst, K.R., Ye, R., Goebel, S.J., Jayaraman, P., and Masters, P.S. (2010). An interaction between the nucleocapsid protein and a component of the replicase-transcriptase complex is crucial for the infectivity of coronavirus genomic RNA. *J. Virol.* **84**, 10276–10288.
- Hurst, K.R., Koetzner, C.A., and Masters, P.S. (2013). Characterization of a critical interaction between the coronavirus nucleocapsid protein and nonstructural protein 3 of the viral replicase-transcriptase complex. *J. Virol.* **87**, 9159–9172.
- Iserman, C., Roden, C., Boerneke, M., Sealfon, R., McLaughlin, G., Jungreis, I., Park, C., Boppana, A., Fritch, E., Hou, Y.J., et al. (2020). Specific viral RNA drives the SARS CoV-2 nucleocapsid to phase separate. *bioRxiv.* 2020.06.11.147199. <https://doi.org/10.1101/2020.06.11.147199>.
- Jack, A., Ferro, L.S., Trnka, M.J., Wehri, E., Nadgri, A., Costa, K., Schaletzky, J., and Yildiz, A. (2020). SARS CoV-2 nucleocapsid protein forms condensates with viral genomic RNA. *bioRxiv.* 2020.09.14.295824. <https://doi.org/10.1101/2020.09.14.295824>.
- Jain, A., Liu, R., Xiang, Y.K., and Ha, T. (2012). Single-molecule pull-down for studying protein interactions. *Nat. Protoc.* **7**, 445–452.
- Jayaram, H., Fan, H., Bowman, B.R., Ooi, A., Jayaram, J., Collisson, E.W., Lescar, J., and Prasad, B.V. (2006). X-ray structures of the N- and C-terminal domains of a coronavirus nucleocapsid protein: implications for nucleocapsid formation. *J. Virol.* **80**, 6612–6620.

- Kang, S., Yang, M., Hong, Z., Zhang, L., Huang, Z., Chen, X., He, S., Zhou, Z., Zhou, Z., Chen, Q., et al. (2020). Crystal structure of SARS-CoV-2 nucleocapsid protein RNA binding domain reveals potential unique drug targeting sites. *Acta Pharm. Sin. B* **10**, 1228–1238.
- Keane, S.C., and Giedroc, D.P. (2013). Solution structure of mouse hepatitis virus (MHV) nsp3a and determinants of the interaction with MHV nucleocapsid (N) protein. *J. Virol.* **87**, 3502–3515.
- Keane, S.C., Liu, P., Leibowitz, J.L., and Giedroc, D.P. (2012). Functional transcriptional regulatory sequence (TRS) RNA binding and helix destabilizing determinants of murine hepatitis virus (MHV) nucleocapsid (N) protein. *J. Biol. Chem.* **287**, 7063–7073.
- Keenen, M.M., Larson, A.G., and Narlikar, G.J. (2018). Visualization and Quantitation of Phase-Separated Droplet Formation by Human HP1 $\alpha$ . *Methods Enzymol.* **617**, 51–66.
- Kim, D., Lee, J.Y., Yang, J.S., Kim, J.W., Kim, V.N., and Chang, H. (2020). The Architecture of SARS-CoV-2 Transcriptome. *Cell* **181**, 914–921.e10.
- Klann, K., Bojkova, D., Tascher, G., Ciesek, S., Munch, C., and Cinatl, J. (2020). Growth Factor Receptor Signaling Inhibition Prevents SARS-CoV-2 Replication. *Mol. Cell* **80**, 164–174.e4.
- Klein, S., Cortese, M., Winter, S.L., Wachsmuth-Melm, M., Neufeldt, C.J., Cerikan, B., Stanifer, M.L., Boulant, S., Bartenschlager, R., and Chlanda, P. (2020). SARS-CoV-2 structure and replication characterized by in situ cryo-electron tomography. *Nat. Commun.* **11**, 5885.
- Knoops, K., Kikkert, M., Worm, S.H., Zevenhoven-Dobbe, J.C., van der Meer, Y., Koster, A.J., Mommaas, A.M., and Snijder, E.J. (2008). SARS-coronavirus replication is supported by a reticulovesicular network of modified endoplasmic reticulum. *PLoS Biol.* **6**, e226.
- Lancaster, A.K., Nutter-Upham, A., Lindquist, S., and King, O.D. (2014). PLAAC: a web and command-line application to identify proteins with prion-like amino acid composition. *Bioinformatics* **30**, 2501–2502.
- Larson, A.G., and Narlikar, G.J. (2018). The Role of Phase Separation in Heterochromatin Formation, Function, and Regulation. *Biochemistry* **57**, 2540–2548.
- Larson, A.G., Elhatan, D., Keenen, M.M., Trnka, M.J., Johnston, J.B., Burlingame, A.L., Agard, D.A., Redding, S., and Narlikar, G.J. (2017). Liquid droplet formation by HP1 $\alpha$  suggests a role for phase separation in heterochromatin. *Nature* **547**, 236–240.
- Laude, H., and Masters, P.S. (1995). The coronavirus nucleocapsid protein. In *The Coronaviridae*, S.G. Siddell, ed. (New York: Plenum Press), pp. 141–163.
- Li, J., Guo, M., Tian, X., Liu, C., Wang, X., Yang, X., Wu, P., Xiao, Z., Qu, Y., Yin, Y., et al. (2020). Virus-Host Interactome and Proteomic Survey Reveal Potential Virulence Factors Influencing SARS-CoV-2 Pathogenesis. *Med.* <https://doi.org/10.1016/j.medj.2020.07.002>.
- Lu, S., Ye, Q., Singh, D., Villa, E., Cleveland, D.W., and Corbett, K.D. (2020). The SARS-CoV-2 Nucleocapsid phosphoprotein forms mutually exclusive condensates with RNA and the membrane-associated M protein. *bioRxiv*. 2020.07.30.228023. <https://doi.org/10.1101/2020.07.30.228023>.
- Luo, H., Ye, F., Sun, T., Yue, L., Peng, S., Chen, J., Li, G., Du, Y., Xie, Y., Yang, Y., et al. (2004). In vitro biochemical and thermodynamic characterization of nucleocapsid protein of SARS. *Biophys. Chem.* **112**, 15–25.
- Luo, H., Ye, F., Chen, K., Shen, X., and Jiang, H. (2005). SR-rich motif plays a pivotal role in recombinant SARS coronavirus nucleocapsid protein multimerization. *Biochemistry* **44**, 15351–15358.
- Luo, H., Chen, J., Chen, K., Shen, X., and Jiang, H. (2006). Carboxyl terminus of severe acute respiratory syndrome coronavirus nucleocapsid protein: self-association analysis and nucleic acid binding characterization. *Biochemistry* **45**, 11827–11835.
- Masters, P.S. (2006). The molecular biology of coronaviruses. *Adv. Virus Res.* **66**, 193–292.
- Masters, P.S. (2019). Coronavirus genomic RNA packaging. *Virology* **537**, 198–207.
- McCormick, C., and Khapersky, D.A. (2017). Translation inhibition and stress granules in the antiviral immune response. *Nat. Rev. Immunol.* **17**, 647–660.
- Morgan, D.O. (1997). Cyclin-dependent kinases: engines, clocks, and micro-processors. *Annu. Rev. Cell Dev. Biol.* **13**, 261–291.
- Nabeel-Shah, N., Lee, H., Ahmed, N., Marcon, E., Farhangmehr, S., Pu, S., Burke, G.L., Ashraf, K., Wei, H., Zhong, G., et al. (2020). SARS-CoV-2 nucleocapsid protein attenuates stress granule formation and alters gene expression via direct interaction with host mRNAs. *bioRxiv*. <https://doi.org/10.1101/2020.10.23.342113>.
- Neuman, B.W., Angelini, M.M., and Buchmeier, M.J. (2014). Does form meet function in the coronavirus replicative organelle? *Trends Microbiol.* **22**, 642–647.
- Nevers, Q., Albertini, A.A., Lagaudrière-Gesbert, C., and Gaudin, Y. (2020). Negri bodies and other virus membrane-less replication compartments. *Biochim. Biophys. Acta. Mol. Cell Res.* **1867**, 118831.
- Nikolakaki, E., and Giannakouros, T. (2020). SR/RS Motifs as Critical Determinants of Coronavirus Life Cycle. *Front. Mol. Biosci.* **7**, 219.
- Nikolic, J., Le Bars, R., Lama, Z., Scrima, N., Lagaudrière-Gesbert, C., Gaudin, Y., and Blondel, D. (2017). Negri bodies are viral factories with properties of liquid organelles. *Nat. Commun.* **8**, 58.
- Owen, I., and Shewmaker, F. (2019). The Role of Post-Translational Modifications in the Phase Transitions of Intrinsically Disordered Proteins. *Int. J. Mol. Sci.* **20**, E5501.
- Peng, T.Y., Lee, K.R., and Tarn, W.Y. (2008). Phosphorylation of the arginine/serine dipeptide-rich motif of the severe acute respiratory syndrome coronavirus nucleocapsid protein modulates its multimerization, translation inhibitory activity and cellular localization. *FEBS J.* **275**, 4152–4163.
- Perdikari, T.M., Murthy, A.C., Ryan, V.H., Watters, S., Naik, M.T., and Fawzi, N.L. (2020). SARS-CoV-2 nucleocapsid protein phase-separates with RNA and with human hnRNPs. *EMBO J.* <https://doi.org/10.15252/embj.2020106478>.
- Protter, D.S.W., and Parker, R. (2016). Principles and Properties of Stress Granules. *Trends Cell Biol.* **26**, 668–679.
- Rohou, A., and Grigorieff, N. (2015). CTFFIND4: Fast and accurate defocus estimation from electron micrographs. *J. Struct. Biol.* **192**, 216–221.
- Samavarchi-Tehrani, P., Abdouni, H., Knight, J.D.R., Astori, A., Samson, R., Lin, Z.Y., Kim, D.K., Knapp, J.J., St-Germain, J., Go, C.D., et al. (2020). A SARS-CoV-2 - host proximity interactome. *bioRxiv*. <https://doi.org/10.1101/2020.09.03.282103>.
- Savastano, A., Ibanez de Opakua, A., Rankovic, M., and Zweckstetter, M. (2020). Nucleocapsid protein of SARS-CoV-2 phase separates into RNA-rich polymerase-containing condensates. *bioRxiv*. <https://doi.org/10.1101/2020.06.18.160648>.
- Shin, Y., and Brangwynne, C.P. (2017). Liquid phase condensation in cell physiology and disease. *Science* **357**, eaaf4382.
- Snijder, E.J., Decroly, E., and Ziebuhr, J. (2016). The Nonstructural Proteins Directing Coronavirus RNA Synthesis and Processing. *Adv. Virus Res.* **96**, 59–126.
- Snijder, E.J., Limpens, R.W.A.L., de Wilde, A.H., de Jong, A.W.M., Zevenhoven-Dobbe, J.C., Maier, H.J., Faas, F.F.G.A., Koster, A.J., and Bárcena, M. (2020). A unifying structural and functional model of the coronavirus replication organelle: Tracking down RNA synthesis. *PLoS Biol.* **18**, e3000715.
- Sola, I., Almazán, F., Zúñiga, S., and Enjuanes, L. (2015). Continuous and Discontinuous RNA Synthesis in Coronaviruses. *Annu. Rev. Virol.* **2**, 265–288.
- Stertz, S., Reichelt, M., Spiegel, M., Kuri, T., Martínez-Sobrido, L., García-Sastre, A., Weber, F., and Kochs, G. (2007). The intracellular sites of early replication and budding of SARS-coronavirus. *Virology* **367**, 304–315.
- Stohman, S.A., Fleming, J.O., Patton, C.D., and Lai, M.M. (1983). Synthesis and subcellular localization of the murine coronavirus nucleocapsid protein. *Virology* **130**, 527–532.
- Stukalov, A., Girault, V., Grass, V., Bergant, V., Karayel, O., Urban, C., Haas, D.A., Huang, Y., Oubraham, L., Wang, A., et al. (2020). Multi-level proteomics reveals host-perturbation strategies of SARS-CoV-2 and SARS-CoV. *bioRxiv*. <https://doi.org/10.1101/2020.06.17.156455>.

- Surjit, M., Kumar, R., Mishra, R.N., Reddy, M.K., Chow, V.T., and Lal, S.K. (2005). The severe acute respiratory syndrome coronavirus nucleocapsid protein is phosphorylated and localizes in the cytoplasm by 14-3-3-mediated translocation. *J. Virol.* **79**, 11476–11486.
- Takeda, M., Chang, C.K., Ikeya, T., Güntert, P., Chang, Y.H., Hsu, Y.L., Huang, T.H., and Kainosho, M. (2008). Solution structure of the c-terminal dimerization domain of SARS coronavirus nucleocapsid protein solved by the SAIL-NMR method. *J. Mol. Biol.* **380**, 608–622.
- Tauber, D., Tauber, G., and Parker, R. (2020). Mechanisms and Regulation of RNA Condensation in RNP Granule Formation. *Trends Biochem. Sci.* **45**, 764–778.
- Tsai, W.C., and Lloyd, R.E. (2014). Cytoplasmic RNA Granules and Viral Infection. *Annu. Rev. Virol.* **1**, 147–170.
- Ulasli, M., Verheije, M.H., de Haan, C.A., and Reggiori, F. (2010). Qualitative and quantitative ultrastructural analysis of the membrane rearrangements induced by coronavirus. *Cell. Microbiol.* **12**, 844–861.
- V'kovski, P., Gerber, M., Kelly, J., Pfaender, S., Ebert, N., Braga Lagache, S., Simillion, C., Portmann, J., Stalder, H., Gaschen, V., et al. (2019). Determination of host proteins composing the microenvironment of coronavirus replicase complexes by proximity-labeling. *eLife* **8**, e42037.
- Verheije, M.H., Raaben, M., Mari, M., Te Lintelo, E.G., Reggiori, F., van Kuppeveld, F.J., Rottier, P.J., and de Haan, C.A. (2008). Mouse hepatitis coronavirus RNA replication depends on GBF1-mediated ARF1 activation. *PLoS Pathog.* **4**, e1000088.
- Verheije, M.H., Hagemeijer, M.C., Ulasli, M., Reggiori, F., Rottier, P.J., Masters, P.S., and de Haan, C.A. (2010). The coronavirus nucleocapsid protein is dynamically associated with the replication-transcription complexes. *J. Virol.* **84**, 11575–11579.
- Wang, Y., Wu, X., Wang, Y., Li, B., Zhou, H., Yuan, G., Fu, Y., and Luo, Y. (2004). Low stability of nucleocapsid protein in SARS virus. *Biochemistry* **43**, 11103–11108.
- Weissmann, F., Petzold, G., VanderLinden, R., Huis In 't Veld, P.J., Brown, N.G., Lampert, F., Westermann, S., Stark, H., Schulman, B.A., and Peters, J.M. (2016). biGBac enables rapid gene assembly for the expression of large multisubunit protein complexes. *Proc. Natl. Acad. Sci. USA* **113**, E2564–E2569.
- White, T.C., Yi, Z., and Hogue, B.G. (2007). Identification of mouse hepatitis coronavirus A59 nucleocapsid protein phosphorylation sites. *Virus Res.* **126**, 139–148.
- Wolff, G., Limpens, R.W.A.L., Zevenhoven-Dobbe, J.C., Laugks, U., Zheng, S., de Jong, A.W.M., Koning, R.I., Agard, D.A., Grünewald, K., Koster, A.J., et al. (2020). A molecular pore spans the double membrane of the coronavirus replication organelle. *Science* **369**, 1395–1398.
- Woo, J., Lee, E.Y., Lee, M., Kim, T., and Cho, Y.E. (2019). An in vivo cell-based assay for investigating the specific interaction between the SARS-CoV N-protein and its viral RNA packaging sequence. *Biochem. Biophys. Res. Commun.* **520**, 499–506.
- Wu, C.H., Yeh, S.H., Tsay, Y.G., Shieh, Y.H., Kao, C.L., Chen, Y.S., Wang, S.H., Kuo, T.J., Chen, D.S., and Chen, P.J. (2009). Glycogen synthase kinase-3 regulates the phosphorylation of severe acute respiratory syndrome coronavirus nucleocapsid protein and viral replication. *J. Biol. Chem.* **284**, 5229–5239.
- Wu, C.H., Chen, P.J., and Yeh, S.H. (2014). Nucleocapsid phosphorylation and RNA helicase DDX1 recruitment enables coronavirus transition from discontinuous to continuous transcription. *Cell Host Microbe* **16**, 462–472.
- Yang, D., and Leibowitz, J.L. (2015). The structure and functions of coronavirus genomic 3' and 5' ends. *Virus Res.* **206**, 120–133.
- Yang, D., Liu, P., Wudeck, E.V., Giedroc, D.P., and Leibowitz, J.L. (2015). SHAPE analysis of the RNA secondary structure of the Mouse Hepatitis Virus 5' untranslated region and N-terminal nsp1 coding sequences. *Virology* **475**, 15–27.
- Yao, H., Song, Y., Chen, Y., Wu, N., Xu, J., Sun, C., Zhang, J., Weng, T., Zhang, Z., Wu, Z., et al. (2020). Molecular Architecture of the SARS-CoV-2 Virus. *Cell* **183**, 730–738.e13.
- Ye, Q., West, A.M.V., Silletti, S., and Corbett, K.D. (2020). Architecture and self-assembly of the SARS-CoV-2 nucleocapsid protein. *Protein Sci.* <https://doi.org/10.1002/pro.3909>.
- Yu, I.M., Gustafson, C.L., Diao, J., Burgner, J.W., 2nd, Li, Z., Zhang, J., and Chen, J. (2005). Recombinant severe acute respiratory syndrome (SARS) coronavirus nucleocapsid protein forms a dimer through its C-terminal domain. *J. Biol. Chem.* **280**, 23280–23286.
- Yu, I.M., Oldham, M.L., Zhang, J., and Chen, J. (2006). Crystal structure of the severe acute respiratory syndrome (SARS) coronavirus nucleocapsid protein dimerization domain reveals evolutionary linkage between corona- and arteriviridae. *J. Biol. Chem.* **281**, 17134–17139.
- Zhou, Y., Su, J.M., Samuel, C.E., and Ma, D. (2019). Measles Virus Forms Inclusion Bodies with Properties of Liquid Organelles. *J. Virol.* **93**, e00948-19.
- Zivanov, J., Nakane, T., Forsberg, B.O., Kimanius, D., Hagen, W.J., Lindahl, E., and Scheres, S.H. (2018). New tools for automated high-resolution cryo-EM structure determination in RELION-3. *eLife* **7**, e42166.
- Zúñiga, S., Cruz, J.L., Sola, I., Mateos-Gómez, P.A., Palacio, L., and Enjuanes, L. (2010). Coronavirus nucleocapsid protein facilitates template switching and is required for efficient transcription. *J. Virol.* **84**, 2169–2175.
- Zuwała, K., Golda, A., Kabala, W., Burmistrz, M., Zdzalik, M., Nowak, P., Kedracka-Krok, S., Zarebski, M., Dobrucki, J., Florek, D., et al. (2015). The nucleocapsid protein of human coronavirus NL63. *PLoS ONE* **10**, e0117833.

## STAR★METHODS

## KEY RESOURCES TABLE

| REAGENT or RESOURCE                                     | SOURCE                      | IDENTIFIER           |
|---------------------------------------------------------|-----------------------------|----------------------|
| <b>Bacterial and Virus Strains</b>                      |                             |                      |
| One Shot™ BL21 Star™ (DE3)                              | Thermo Fisher               | Cat # C601003        |
| <b>Chemicals, Peptides, and Recombinant Proteins</b>    |                             |                      |
| Phenylmethanesulfonyl fluoride (PMSF)                   | Sigma                       | Cat # P7626          |
| cComplete™, Mini, EDTA-free Protease Inhibitor Cocktail | Roche                       | Cat # 4693159001     |
| 10X TBE                                                 | BioRad                      | Cat # 1610733        |
| Ulp1 (aa 406-622)                                       | This study                  | N/A                  |
| IPTG                                                    | Grow cells                  | Cat # MESP-2002      |
| Imidazole                                               | Sigma                       | Cat # 1202           |
| Human GSK-3β                                            | Promega                     | Cat # V1991          |
| Human Cdk1-cyclin B1                                    | This study                  | N/A                  |
| SARS-CoV-2 N protein constructs                         | This study                  | N/A                  |
| SARS-CoV-2 Nsp3 Ubl1 domain (aa 1-110)-GFP              | This study                  | N/A                  |
| <sup>32</sup> P-γ-ATP                                   | Perkin Elmer                | Cat # BLU502A250UC   |
| Glass bottom 384-well plate                             | Greiner Bio                 | Cat # 781892         |
| mPEG-Saline                                             | Laysan Bio                  | Item # MPEG-SIL-5000 |
| ATP                                                     | Sigma                       | Cat # A26209         |
| Uranyl Formate                                          | VWR                         | Cat # 101410-834     |
| Glider Hexagonal Grid 400 mesh, copper                  | Electron microscopy science | Cat # G400H-Cu       |
| 10% TBE-Urea gel                                        | Invitrogen                  | Cat # EC68755        |
| 10% Mini-PROTEAN® TGX™ Precast Protein Gels             | BioRad                      | Cat # 4561036        |
| Alexa Fluor™ 488 NHS Ester                              | Invitrogen                  | Cat # A20000         |
| SYBR Gold                                               | Invitrogen                  | Cat # S11494         |
| Desthiobiotin                                           | Sigma                       | Cat # D1411          |
| Phosphocreatine                                         | Sigma                       | Cat # 10621714001    |
| Creatine Kinase                                         | Sigma                       | Cat # C3755          |
| <b>Critical Commercial Assays</b>                       |                             |                      |
| HiScribe™ T7 High Yield RNA Synthesis Kit               | NEB                         | Cat # E2040S         |
| Superdex S200 10/300 GL                                 | GE                          | Cat # 17-5175-01     |
| Amicon Ultra-0.5 Centrifugal Filter Unit – 30kDa        | Millipore                   | Cat # UFC503096      |
| Amicon Ultra-15 Centrifugal Filter Unit – 30kDa         | Millipore                   | Cat # UFC903024      |
| Ni-NTA Agarose                                          | QIAGEN                      | Cat # 30230          |
| Zeba™ Spin Desalting Columns, 7K MWCO, 0.5 mL           | Thermo                      | Cat # 89882          |
| Dialysis membrane                                       | Spectrum Labs               | Cat # 132676         |
| RNA Clean & Concentrator                                | Zymo Research               | Cat # 11-353         |
| HisTRAP column                                          | Cytiva                      | Cat # 17524701       |
| StrepTRAP column                                        | Cytiva                      | Cat # 28907546       |
| <b>Experimental Models: Cell Lines</b>                  |                             |                      |
| Sf9                                                     | Thermo                      | Cat # 11496015       |
| <b>Recombinant DNA</b>                                  |                             |                      |
| pLIB: Cdk1 (untagged)                                   | This study                  | N/A                  |
| pLIB: 6xHis-Myc-Cyclin B1                               | This study                  | N/A                  |
| pET28a: 6xHIS-tev-Ulp1 (406-622)                        | This study                  | N/A                  |

(Continued on next page)

**Continued**

| REAGENT or RESOURCE                                                                                                                                                       | SOURCE                 | IDENTIFIER                                                                                                                                              |
|---------------------------------------------------------------------------------------------------------------------------------------------------------------------------|------------------------|---------------------------------------------------------------------------------------------------------------------------------------------------------|
| pET28a: 6xHis-Smt3-N                                                                                                                                                      | This study             | N/A                                                                                                                                                     |
| pET28a: 6xHis-Smt3-N ΔSR                                                                                                                                                  | This study             | N/A                                                                                                                                                     |
| pET28a: 6xHis-Smt3-N ΔNTE                                                                                                                                                 | This study             | N/A                                                                                                                                                     |
| pET28a: 6xHis-Smt3-N ΔCTE                                                                                                                                                 | This study             | N/A                                                                                                                                                     |
| pET28a: 6xHis-Smt3-N ΔCBP                                                                                                                                                 | This study             | N/A                                                                                                                                                     |
| pET28a: 6xHis-Smt3-N ΔNTE+ΔCTE                                                                                                                                            | This study             | N/A                                                                                                                                                     |
| pET28a: 6xHis-Smt3-N 10D                                                                                                                                                  | This study             | N/A                                                                                                                                                     |
| pET28a: 6xHis-Smt3-N 10D ΔNTE                                                                                                                                             | This study             | N/A                                                                                                                                                     |
| pET28a: 6xHis-Smt3-N 10D ΔCTE                                                                                                                                             | This study             | N/A                                                                                                                                                     |
| pET28a: 6xHis-Smt3-N 10D ΔNTE+ΔCTE                                                                                                                                        | This study             | N/A                                                                                                                                                     |
| pET28a: 6xHis-Smt3-N S206A                                                                                                                                                | This study             | N/A                                                                                                                                                     |
| pET28a: Nsp3 (1-110)-GFP-2xStrep                                                                                                                                          | This study             | N/A                                                                                                                                                     |
| Constructs for RNAs used in this study (Table S1)                                                                                                                         | This study             | N/A                                                                                                                                                     |
| <b>Software and Algorithms</b>                                                                                                                                            |                        |                                                                                                                                                         |
| Prism 8                                                                                                                                                                   | Graphpad               | <a href="https://www.graphpad.com/scientific-software/prism/">https://www.graphpad.com/scientific-software/prism/</a>                                   |
| ImageJ                                                                                                                                                                    | Open source            | <a href="https://imagej.net/Welcome">https://imagej.net/Welcome</a>                                                                                     |
| FIJI                                                                                                                                                                      | Open source            | <a href="https://imagej.net/Fiji">https://imagej.net/Fiji</a>                                                                                           |
| Relion-3                                                                                                                                                                  | (Zivanov et al., 2018) | <a href="https://www3.mrc-lmb.cam.ac.uk/relion/index.php/Download_%26_install">https://www3.mrc-lmb.cam.ac.uk/relion/index.php/Download_%26_install</a> |
| <b>Other</b>                                                                                                                                                              |                        |                                                                                                                                                         |
| Uncropped microscopy images are available from Mendeley Data: <a href="https://data.mendeley.com/datasets/88xyp9prs/2">https://data.mendeley.com/datasets/88xyp9prs/2</a> | N/A                    | N/A                                                                                                                                                     |

**RESOURCE AVAILABILITY**

**Lead Contact**

Further information and requests for resources and reagents should be directed to and will be fulfilled by the Lead Contact, David Morgan ([david.morgan@ucsf.edu](mailto:david.morgan@ucsf.edu)).

**Materials Availability**

Materials such as plasmid constructs will be available without further restrictions upon request to the Lead Contact ([david.morgan@ucsf.edu](mailto:david.morgan@ucsf.edu)).

**Data and Code Availability**

Uncropped microscopy images are available from Mendeley Data: <https://data.mendeley.com/datasets/88xyp9prs/2>.

**EXPERIMENTAL MODEL AND SUBJECT DETAILS**

All recombinant proteins were expressed in One Shot BL21 Star (DE3) chemically competent *E. coli* (Thermo). The genotype is: F<sup>+</sup>ompT hsdS<sub>B</sub> (r<sub>B</sub><sup>-</sup>, m<sub>B</sub><sup>-</sup>) galdcmrme131 (DE3).

**METHOD DETAILS**

**Plasmid construction and RNA preparation**

All expression vectors were constructed by Gibson assembly and confirmed by sequencing. Codon-optimized DNAs encoding SARS-CoV-2 N protein (aa 1-419) and Nsp3 Ubl1 domain (aa 819-920 of polyprotein 1a) were ordered as gBlocks from Integrated DNA Technologies (IDT) and cloned into pET28a expression vectors. N protein mutants were constructed by site-directed mutagenesis and Gibson assembly. A 6xHis-SUMO tag was added to the N terminus of all N protein constructs.

Nsp3 Ubl1 domain was engineered with a C-terminal GFP-2xStrep tag. Codon-optimized DNAs encoding human Cdk1 (untagged) and Cyclin B1 (N-terminal 6xHis-4xMyc tag) were ordered as gBlocks from IDT and cloned individually into the baculovirus expression vector pLIB for construction of recombinant baculoviruses (Weissmann et al., 2016). Human GSK-3 $\beta$  was purchased from Promega (V1991).

Sequences of the three viral RNAs and firefly luciferase RNA are provided in Table S1. Templates for transcription *in vitro* of 5'-400 RNA and PS-318 RNA were ordered as gBlocks from IDT and PCR-amplified with a 5' primer carrying a T7 promoter sequence. The template for N-1260 was PCR-amplified with a 5' primer containing a T7 promoter from a PET28a vector carrying PCR-amplified ORF DNA from the 2019-nCoV\_N positive control plasmid from IDT. The N-1260 RNA includes 152 nucleotides from the pET28a plasmid backbone. All RNA synthesis was performed using the HiScribe T7 High Yield RNA synthesis kit (NEB E2040S) according to the manufacturer's protocol. Luc-1710 RNA was included as a positive control template in the RNA synthesis kit. The SARS-CoV-2 TRS RNA (UCUAAACGAA, tagged with FAM fluorescent dye) was ordered from IDT.

### Protein purification

N protein vectors were transformed into *E. coli* BL21 Star (Thermo #C601003) for expression. Freshly transformed cells were grown in TB-Kanamycin (50  $\mu$ g/mL) to OD 0.4 at 37°C. The temperature was lowered to 16°C until the cells reached a density of 0.8. Protein expression was then induced with 0.4 mM IPTG for 16 h. Harvested cells were washed with PBS, snap frozen in LN<sub>2</sub>, and stored at -80°C until lysis.

To remove contaminating nucleic acid, N protein was purified under denaturing conditions as previously described (Peng et al., 2008; Wang et al., 2004). Frozen cell pellets were thawed and resuspended in buffer A (50 mM HEPES pH 7.5, 500 mM NaCl, 10% glycerol, 20 mM imidazole, 6 M urea) and lysed by sonication on ice. Lysed cells were centrifuged at 30,000 rpm for 30 min at 4°C to remove cell debris. Clarified lysate was added to Ni-NTA agarose beads (QIAGEN) and incubated for 45 min at 4°C. Ni-NTA beads were then washed 3 times with 10 bed volumes of buffer A, and N protein was eluted with 3 bed volumes buffer B (50 mM HEPES pH 7.5, 500 mM NaCl, 10% glycerol, 250 mM imidazole, 6 M urea). The eluate was concentrated to ~1 mL using centrifugal concentrators (30 kDa cutoff, Amicon) and renatured by overnight dialysis against 2 l buffer C (50 mM HEPES pH 7.5, 500 mM NaCl, 10% glycerol) at 4°C. 100  $\mu$ g recombinant Ulp1 catalytic domain (expressed in and purified from bacteria) was added to renatured protein for 10 min on ice to cleave the 6xHis-SUMO tag. Mutants lacking the NTE were not cleaved as efficiently by Ulp1, and complete cleavage required incubation with Ulp1 at 25°C for 4 h. Cleaved protein was then centrifuged at 15,000 rpm for 10 min and injected onto a Superdex 200 10/300 size exclusion column equilibrated in buffer C. Peak fractions were pooled, frozen in LN<sub>2</sub>, and stored at -80°C.

In early experiments, N protein was purified under native conditions. Frozen cell pellets were thawed and resuspended in buffer D (50 mM HEPES pH 7.5, 500 mM NaCl, 10% glycerol, 20 mM imidazole) supplemented with benzonase, cOmplete EDTA-free protease inhibitor cocktail (Roche), and 1 mM phenylmethylsulfonyl fluoride (PMSF). Cells were lysed by sonication on ice and centrifuged at 30,000 rpm for 30 min at 4°C. Clarified lysate was added to Ni-NTA agarose beads and incubated for 45 min at 4°C. Ni-NTA beads were then washed 3 times with 10 bed volumes buffer D, and N protein was eluted with 3 bed volumes buffer D + 500 mM imidazole. The eluate was concentrated to ~1 mL using centrifugal concentrators (30 kDa cutoff, Amicon) and injected onto a Superdex 200 10/300 size exclusion column. Peak fractions were pooled, snap frozen in LN<sub>2</sub>, and stored at -80°C. Protein concentration was measured by nanodrop, and a major A260 peak was observed. The A260 peak was insensitive to treatment with DNase I, RNase A, RNase H, or benzonase. Additionally, small RNA species were observed on native TBE gels stained with SYBR gold.

Nsp3 Ubl1-GFP was expressed in *E. coli* as described above. Frozen cell pellets were thawed and resuspended in buffer E (50 mM HEPES pH 7.5, 150 mM NaCl, 10% glycerol, 1 mM DTT) supplemented with benzonase, cOmplete EDTA-free protease inhibitor cocktail (Roche), and 1 mM PMSF. Cells were lysed by sonication on ice and centrifuged at 30,000 rpm for 30 min at 4°C. Clarified lysate was then added to a 5 mL StrepTrap HP prepacked column (Cytiva). The column was washed with 10 column volumes buffer E and eluted with 4 column volumes buffer E supplemented with 2.5 mM desthiobiotin. Peak fractions were pooled, snap frozen in LN<sub>2</sub>, and stored at -80°C.

Cdk1-cyclin B1 complexes were prepared as follows. Two 666 mL cultures of SF-900 cells ( $1.6 \times 10^6$  cells/mL) were infected separately with Cdk1 or cyclin B1 baculovirus and harvested after 48 h. The two cell pellets were frozen in LN<sub>2</sub>. Frozen pellets were thawed and each resuspended in 20 mL lysis buffer (50 mM HEPES pH 7.5, 300 mM NaCl, 10% glycerol, 20 mM imidazole, benzonase, and cOmplete EDTA-free protease inhibitor cocktail). Cells were lysed by sonication. To generate an active Cdk1-cyclin B1 complex phosphorylated by Cdk-activating kinase in the lysate (Desai et al., 1992), the two lysates were combined, brought to 5 mM ATP and 10 mM MgCl<sub>2</sub>, and incubated at room temperature for 20 min. The combined lysates were centrifuged at 55,000 rpm for 45 min at 4°C. The supernatant was filtered and passed over a HisTRAP nickel affinity column, washed with wash buffer (50 mM HEPES pH 7.5, 300 mM NaCl, 10% glycerol) and eluted with the same buffer plus 200 mM imidazole. Peak fractions were pooled, concentrated to 0.75 ml, and injected on an S200 size exclusion column in wash buffer. Peak fractions containing the Cdk1-cyclin B1 complex were pooled, concentrated to 1.5 mg/mL, and snap frozen in LN<sub>2</sub>.

### Light microscopy

Glass was prepared as described previously (Keenen et al., 2018). Individual wells in a 384-well glass bottom plate (Greiner #781892) were incubated with 2% Hellmanex detergent for 1 h. Wells were then washed 3 times with 100  $\mu$ L ddH<sub>2</sub>O. 1 M NaOH was added to



the glass for 30 min, followed by washing 3 times with 100  $\mu$ L ddH<sub>2</sub>O. The glass was dried, and 20 mg/mL PEG silane dissolved in 95% EtOH was added to individual wells and incubated overnight (~16 h). The glass was then washed 3 times with 100  $\mu$ L ddH<sub>2</sub>O and dried before sample addition.

The day prior to imaging, protein was thawed and dialyzed against droplet buffer (25 mM HEPES pH 7.5, 70 mM KCl) overnight at 4°C. Protein concentration was quantified by nanodrop. Reactions containing protein and RNA were combined and mixed immediately before adding to individual wells in the PEG-treated 384-well plate. All reactions were incubated for 30 min at room temperature, unless otherwise indicated, before imaging on a Zeiss Axiovert 200M microscope with a 40x oil objective.

### Turbidity analysis

Protein was dialyzed into droplet buffer the night before performing turbidity measurements, as stated above. Protein was then serially diluted into room temperature droplet buffer. After dilution, RNA was added and mixtures were incubated at room temperature for 15 min before measuring absorbance at 340 nm on a Spectramax M5 plate reader.

### Kinase reactions

1  $\mu$ M N protein was incubated with either 0.14  $\mu$ M GSK-3 $\beta$ , 0.91  $\mu$ M Cdk1-Cyclin B1, or both, in a 20  $\mu$ L reaction mixture containing 10 mM MgCl<sub>2</sub>, 1 mM DTT, 500  $\mu$ M ATP, 25 mM HEPES pH 7.8, 50 mM NaCl, and 0.001 mCi/mL <sup>32</sup>P- $\gamma$ -ATP. After incubation at 30°C for 30 min, reactions were quenched with 10  $\mu$ L SDS loading buffer for analysis by SDS-PAGE and visualization with a Phosphorimager. For the priming experiment in Figure 3C, 19  $\mu$ M of each N protein variant was incubated with 2.5  $\mu$ M Cdk1-Cyclin B1 overnight at 25°C in kinase buffer A (20 mM HEPES pH 7.4, 300 mM NaCl, 20 mM MgCl<sub>2</sub>, 1 mM DTT, 1 mM ATP). Reactions were desalted into kinase buffer B (20 mM HEPES pH 7.4, 20 mM MgCl<sub>2</sub>, 1 mM DTT, 500  $\mu$ M ATP). 10  $\mu$ M of desalted N protein was incubated with 0.17  $\mu$ M GSK-3 $\beta$  and 0.05  $\mu$ Ci <sup>32</sup>P- $\gamma$ -ATP. After various times, reactions were quenched with SDS loading buffer for analysis by SDS-PAGE and visualization with a Phosphorimager.

Phosphorylated protein for droplet analysis was prepared in reactions containing 25  $\mu$ M N protein, 1  $\mu$ M Cdk1-cyclin B1, 0.2  $\mu$ M GSK-3 $\beta$ , 2 mM ATP, 20 mM MgCl<sub>2</sub>, 15 mM HEPES pH 7.5, 300 mM NaCl, 5% glycerol, 1 mM DTT, 8 mM phosphocreatine (Sigma 10621714001), and 0.016 mg/mL creatine kinase (Sigma C3755). The reaction was incubated for 2 h at 30°C and then dialyzed overnight into droplet buffer at 4°C. RNA addition and droplet visualization were carried out as described above.

### Fluorescence recovery after photobleaching (FRAP)

Purified N protein (wild type or 10D) was labeled by incubation with 3:1 Alexa Fluor 488 NHS Ester (Invitrogen A20000) at 30°C for 45 min. N protein was then purified by size exclusion chromatography, concentrated, and stored at -80°C until use. For FRAP experiments, glass coverslips and slides were cleaned and functionalized with polyethylene glycol as previously described (Jain et al., 2012), and chambers were constructed with double-sided tape. 20  $\mu$ M N protein, diluted to 5% labeled N with unlabeled protein, was mixed with 1  $\mu$ M 5'-400 RNA and immediately added to preassembled glass chambers. Fluorescent droplets were visualized by Total Internal Reflection Fluorescence on a DeltaVision OMX SR microscope with a 60x objective (immersion oil refractive index: 1.516). Images were acquired at a 1 s frame rate for 3 frames, bleached 30 s at 5% absolute transmission at 405 nm, and imaged immediately thereafter. All experiments were performed on droplets of similar size (2.3-2.6  $\mu$ m), 15-30 min after RNA addition.

### Electron microscopy

N protein (10  $\mu$ M) and RNA (1  $\mu$ M PS-318 or 5'-400) were mixed in 10  $\mu$ L droplet buffer and incubated 15 min at room temperature. 3.5  $\mu$ L of this solution was adsorbed onto glow-discharged (PELCO EasiGlow, 15 mA, 0.39 mBar, 30 s) carbon-coated grids (200-400 mesh copper, Quantifoil) for 1 min at room temperature. Sample was blotted off, stained and blotted 5 times with 0.75% uranyl formate, and allowed to air dry. Negative stain images were collected with a Tecnai T12 microscope (FEI) with a LaB6 filament, operated at 120 kV, and a Gatan Ultrascan CCD camera (final pixel size 2.21 Å). Contrast Transfer Function (CTF) estimation was performed with CTFFIND4 (Rohou and Grigorieff, 2015). Automated particle picking, CTF-correction, and two-dimensional averaging and classification were performed in RELION-3 (Zivanov et al., 2018).

## QUANTIFICATION AND STATISTICAL ANALYSIS

### Turbidity Analysis

Turbidity was measured at 340 nm on a Spectramax M5 plate reader, as described in Method Details. Turbidity measurements were performed in duplicate in two independent experiments. Results were normalized to the maximum absorbance signal and analyzed with GraphPad Prism.

### Fluorescence recovery after photobleaching

Image analysis was performed with ImageJ. Fluorescence intensity for the whole droplet was calculated, and background intensity subtracted. Intensity before bleaching was normalized to 100% and intensity after bleaching was normalized to 0%. Data were analyzed with GraphPad Prism.

**Molecular Cell, Volume 80**

**Supplemental Information**

**Phosphoregulation of Phase Separation by the  
SARS-CoV-2 N Protein Suggests a Biophysical  
Basis for its Dual Functions**

**Christopher R. Carlson, Jonathan B. Asfaha, Chloe M. Ghent, Conor J. Howard, Nairi Hartooni, Maliheh Safari, Alan D. Frankel, and David O. Morgan**

|       |     |                                                                      |     |
|-------|-----|----------------------------------------------------------------------|-----|
| CoV   | 1   | MSDNGPQSNQRSAPRITFFGGPTDSTDNNQNGGRNGARPKQRRPQGLPNNTASWFTALTQH        | 60  |
| CoV-2 | 1   | <u>MSDNGPQ-NQRNAPRITFFGGPSDSTGNSQNGERSGARSKQRRPQGLPNNTASWFTALTQH</u> | 59  |
| NTE   |     |                                                                      |     |
| CoV   | 61  | GKEELRFPRGQGVPIINTNSGPDDQIGYYRRATRRVRGGDGKMKELSPRWYFYLLGTGPEA        | 120 |
| CoV-2 | 60  | GKEDLKFPRGQGVPIINTNSSPDDQIGYYRRATRRIRGGDGKMKDLSPRWYFYLLGTGPEA        | 119 |
| CoV   | 121 | SLPYGANKEGIVVATEGALNTPKDHIGTRNPNNNAATVLQLPQGTTLPKGFYAEFSRGG          | 180 |
| CoV-2 | 120 | GLPYGANKDGIIVVATEGALNTPKDHIGTRNPANNAIIVLQLPQGTTLPKGFYAEFSRGG         | 179 |
| CoV   | 181 | SQASSRSSRSRGNSSRNSTPGSSRGNSSPARMASGGGETALALLLLDRLNQLSEKVSQKQ         | 240 |
| CoV-2 | 180 | <u>SQASSRSSRSRGNSSRNSTPGSSRGTSPARMAGNGGDAALALLLLDRLNQLSEKMSGKQ</u>   | 239 |
| SR    |     |                                                                      |     |
| CoV   | 241 | QQQGQTVTKKSAAEASKKPRQKRTATKQYNVTQAFGRRGPEQTQGNFGDQDLIRQGTDYK         | 300 |
| CoV-2 | 240 | QQQGQTVTKKSAAEASKKPRQKRTATKAYNVTQAFGRRGPEQTQGNFGDQELIRQGTDYK         | 299 |
| CBP   |     |                                                                      |     |
| CoV   | 301 | HWPQIAQFAPSASAFFGMSRIGMEVTPSGTWLTYHGAIKLDKDPQFKDQVILLNKHIDA          | 360 |
| CoV-2 | 300 | HWPQIAQFAPSASAFFGMSRIGMEVTPSGTWLTYTGAIKLDKDPNFKDQVILLNKHIDA          | 359 |
| CoV   | 361 | YKTFPTEPKKDKKKKTDEAQLPQRQKKQPTVTLLPAADMDDFSRQLQNSMSGASADST           | 420 |
| CoV-2 | 360 | <u>YKTFPTEPKKDKKKKADETAQLPQRQKKQPTVTLLPAADLDDFSKQLQQSMS--SADST</u>   | 417 |
| CTE   |     |                                                                      |     |
| CoV   | 421 | QA                                                                   | 422 |
| CoV-2 | 418 | <u>QA</u>                                                            | 419 |

**Figure S1. Amino acid sequences of N proteins from SARS-CoV and SARS-CoV-2, related to Figure 1A.**

The two globular domains, NTD and CTD, are highlighted in gray. Underlining indicates the four regions analyzed by deletion mutants. Acidic residues highlighted in pink, basic residues highlighted in blue, and phosphorylation sites of the SR region highlighted in yellow.

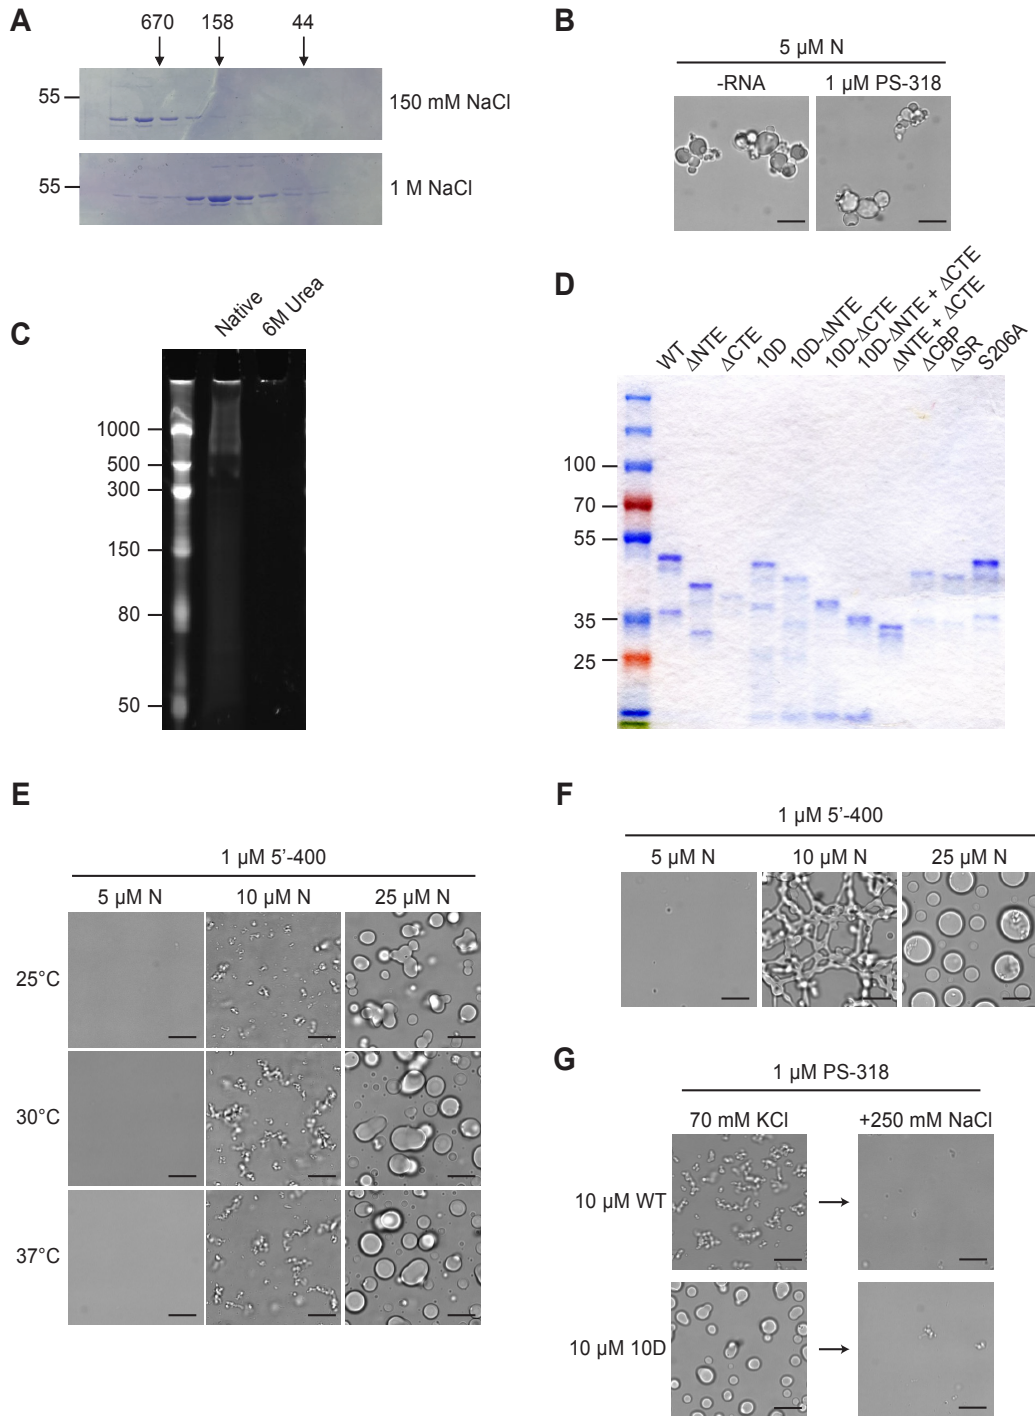

**Figure S2. Characterization of N protein behavior, related to Figure 1B.**

(A) Superdex 200 gel filtration analysis of native N protein at 150 mM or 1 M NaCl, purified under non-denaturing conditions. Arrows at top indicate migration of molecular weight standards (kDa). Fractions were analyzed by SDS-PAGE and Coomassie Blue staining.

(B) Representative images of 5  $\mu$ M native N protein after incubation in the presence or absence of 1  $\mu$ M PS-318 RNA. Scale bar, 10  $\mu$ m.

(C) 5  $\mu$ l of 10  $\mu$ M N protein (purified under native or denaturing [6M Urea] conditions) was mixed with urea loading buffer, incubated at 65°C for 5 min, and separated on a 10% polyacrylamide TBE-Urea gel, followed by staining with SYBR Gold. RNA length standards (nt) in left lane.

(D) SDS-PAGE analysis of all N protein mutants used in this study, stained with Coomassie Blue.

(E) N protein was incubated at the indicated temperature for 30 min in the presence of 1  $\mu$ M 5'-400 RNA. Scale bar, 10  $\mu$ m.

(F) N protein was incubated with 1  $\mu$ M 5'-400 for 16 h at room temperature. Scale bar, 10  $\mu$ m.

(G) Condensates of 10  $\mu$ M WT or 10D N protein were formed in droplet buffer (70 mM KCl) by incubation with 1  $\mu$ M PS-318 RNA for 30 min and imaged. NaCl was then added to a final concentration of 250 mM for 15 min before imaging again.

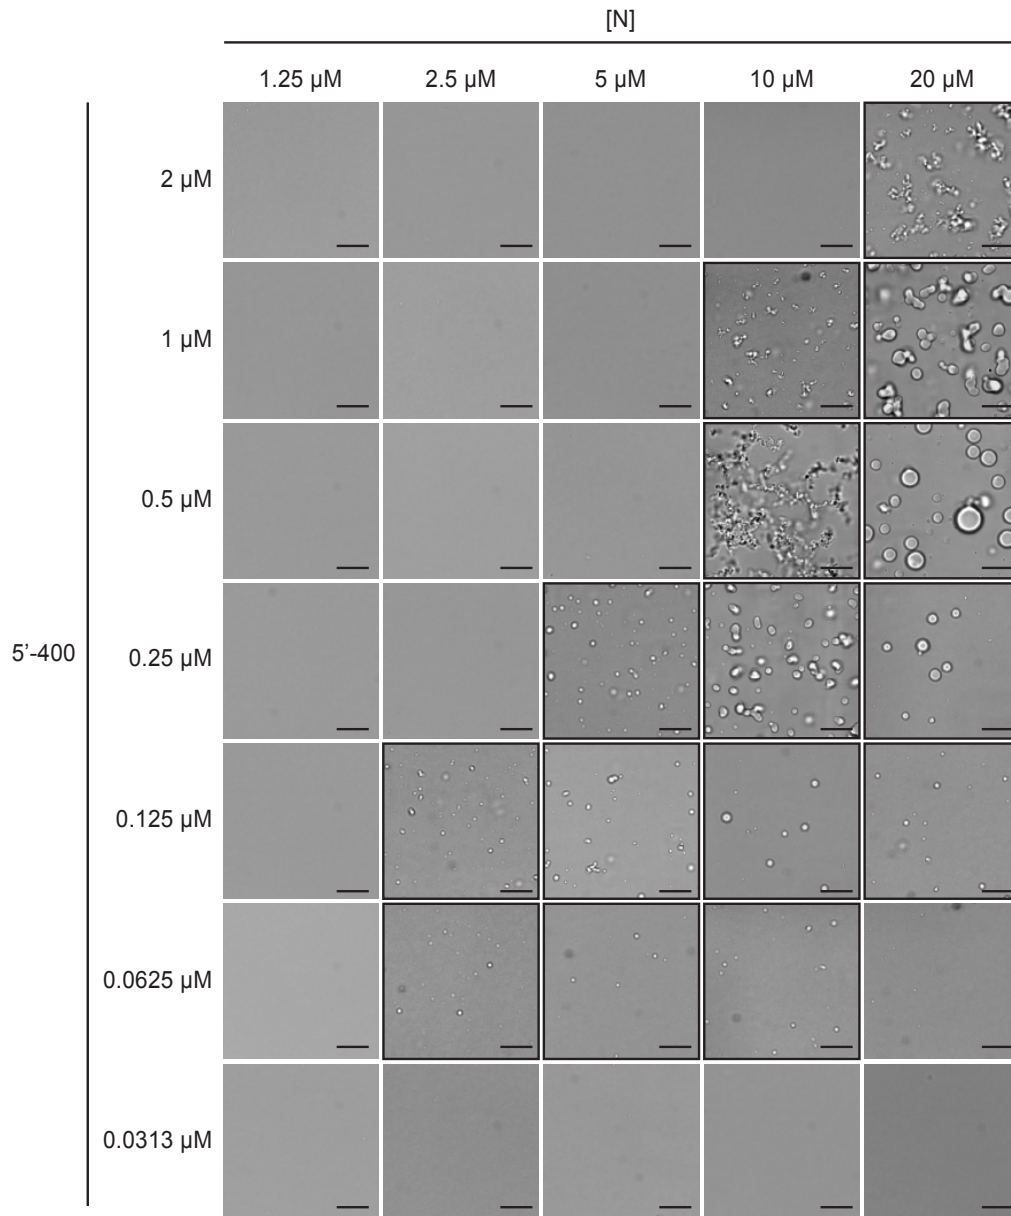

**Figure S3. Condensate formation at a range of N protein and 5'-400 RNA concentrations, related to Figure 1C.**

Light microscopy images of N protein condensates after 30 min incubation at room temperature with the indicated concentrations of 5'-400 RNA. Images that contain visible condensates are highlighted with a black border. Scale bar, 10  $\mu$ m.

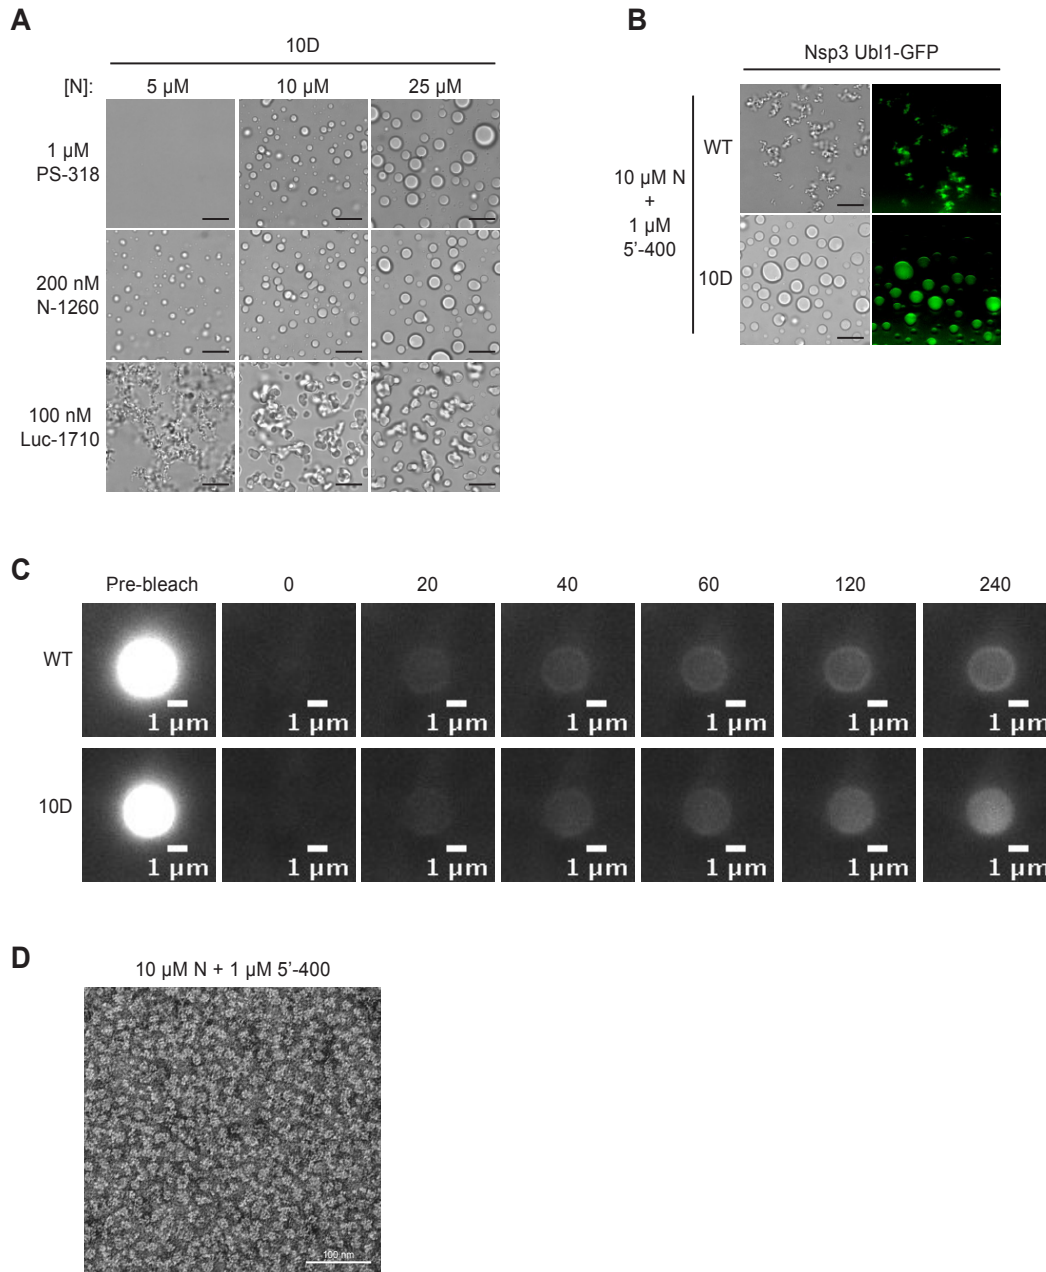

**Figure S4. Properties of wild-type N protein and 10D mutant, related to Figures 3 and 4.**

(A) Images of N protein 10D mutant following 30 min incubation with the indicated RNAs. Scale bar, 10  $\mu\text{m}$ .

(B) 10  $\mu\text{M}$  wild-type (WT) or 10D N protein was incubated with 1  $\mu\text{M}$  5'-400 RNA for 10 min. Nsp3 Ubl1-GFP was then added to a concentration of 1  $\mu\text{M}$  and incubated for an additional 15 min before imaging in brightfield (left) or fluorescence (right).

(C) Images of droplets formed with 20  $\mu\text{M}$  fluorescent N protein (WT or 10D) and 1  $\mu\text{M}$  5'-400 RNA, before photobleaching and at the indicated times (s) after bleaching. Scale bar, 1  $\mu\text{m}$ .

(D) 10  $\mu\text{M}$  wild-type N protein was incubated with 1  $\mu\text{M}$  5'-400 RNA for 15 min prior to analysis by negative-stain electron microscopy. Scale bar, 100 nm.

**Table S1. RNA sequences used in this study, related to Figures 1-4.**

|                                                                                                                                                                                               |                                                                                                                                                                                                                                                                                                                                                                                                                                                                                                                                                                                                                                                                                                                                                                                                                                                                                                                                                                                                                                                                                                                                                                                                                                                                                                                                                                                                                                                                                                                                                                                                                                                               |
|-----------------------------------------------------------------------------------------------------------------------------------------------------------------------------------------------|---------------------------------------------------------------------------------------------------------------------------------------------------------------------------------------------------------------------------------------------------------------------------------------------------------------------------------------------------------------------------------------------------------------------------------------------------------------------------------------------------------------------------------------------------------------------------------------------------------------------------------------------------------------------------------------------------------------------------------------------------------------------------------------------------------------------------------------------------------------------------------------------------------------------------------------------------------------------------------------------------------------------------------------------------------------------------------------------------------------------------------------------------------------------------------------------------------------------------------------------------------------------------------------------------------------------------------------------------------------------------------------------------------------------------------------------------------------------------------------------------------------------------------------------------------------------------------------------------------------------------------------------------------------|
| <p><b>5'-400</b></p> <p>5' 400 nt from SARS-CoV-2 (Wuhan Hu-1 strain; nt 1-400).</p>                                                                                                          | <p>AUUAAAGGUUUUAUACCUUCCCAGGUAACAAACCAACCAACUUUCGAU<br/> CUCUUGUAGAUCUGUUCUCUAAACGAACUUUAAAAUCUGUGUGGCU<br/> GUCACUCGGCUGCAUGCUUAGUGCACUCACGCAGUAUAAUUAAUAA<br/> CUAAUUACUGUCGUUGACAGGACACGAGUAACUCGUCUAUCUUCUG<br/> CAGGCUGCUUACGGUUUCGUCCGUGUUGCAGCCGAUCAUCAGCACA<br/> UCUAGGUUUCGUCCGGGUGUGACCGAAAGGUAAGAUGGAGAGCCUU<br/> GUCCUGGUUUCAACGAGAAAACACACGUCCAACUCAGUUUGCCUG<br/> UUUUACAGGUUCGCGACGUGCUCGUACGUGGCUUUGGAGACUCCG<br/> UGGAGGAGGUCUUAUCAGAGGCACGUCAACAU</p>                                                                                                                                                                                                                                                                                                                                                                                                                                                                                                                                                                                                                                                                                                                                                                                                                                                                                                                                                                                                                                                                                                                                                                                       |
| <p><b>PS-318</b></p> <p>318 nt from SARS CoV (Tor2 strain; nt 19715-20031), with an extra C (red) after A19802 as in (Woo et al., 2019).</p>                                                  | <p>UGAGCUUUGGGCUAAGCGUAACAUUAAACCAGUGCCAGAGAUUAAG<br/> AUACUCAAUAAUUUGGGUGUUGAUUUCGUCGUAUUCUGUAACAU<br/> UGGGACUACAAAAGAGAAGCCCCAGCACAUGUAUCUACAAUAGGUG<br/> UCUGCACAAUGACUGACAUUGCCAAGAAACCUACUGAGAGUGCUUG<br/> UUCUUCACUUCUGUCUUGUUUGAUGGUAGAGUGGAAGGACAGGUA<br/> GACCUUUUJAGAAACGCCCGUAAUGGUGUUUUAAUAACAGAAGGUU<br/> CAGUCAAAGGUCUAACACCUUCAAGGGACCAGCACAAGCUA</p>                                                                                                                                                                                                                                                                                                                                                                                                                                                                                                                                                                                                                                                                                                                                                                                                                                                                                                                                                                                                                                                                                                                                                                                                                                                                                         |
| <p><b>N-1260</b></p> <p>RNA containing the 1260 nt open reading frame (gray highlight) of the N gene from SARS-CoV-2 (Wuhan Hu-1 strain; nt 28274-29533), plus flanking plasmid sequence.</p> | <p>GGGAAUUGUGAGCGGAUAACAAUUCCCUCUAGAAUAAUUUUUGUU<br/> UAACUUUAAGAAGGAGAUUACCAUGGGCAGCAGCCAUCAUCAUCAU<br/> CAUCACAGCAGCGGCCUGGUGCCGCGCGGUACCACGGAAAACCGU<br/> AUUUUCAGGGAUCCAUGUCUGAUAAUGGACCCCAAAUUCAGCGAAA<br/> GCACCCCGCAUUACGUUUGGUGGACCCUCAGAUUCAACUGGCAGUA<br/> ACCAGAAUGGAGAACGCAGUGGGGCGCGAUCAAAACAACGUCGGCC<br/> CCAAGGUUUACCCAUAUACUGCGUCUUGGUUCACCGCUCUCACU<br/> CAACAUGGCAAGGAAGACCUUAAAUUCUCGAGGACAAGGCGUUC<br/> CAAUUAACACCAAUAGCAGUCCAGAUAGCCAAAUUGGCUACUACCGA<br/> AGAGCUACCAGACGAAUUCGUGGUGGUGACGGUAAAUAUGAAAGAU<br/> UCAGUCCAAGAUGGUUUUCUACUACCUAGGAACUGGGCCAGAAGC<br/> UGGACUUCUUAUGGUGCUAACAAAGACGGCAUCAUUAUGGGUUGCA<br/> ACUGAGGGGAGCCUUGAAUACACCAAAAGAUCAAUUGGCACCCGCAA<br/> UCCUGCUAACAAUGCUGCAAUCGUGCUACAACUCCUCAAGGAACAA<br/> CAUUGCCAAAAGGCUUCUACGCAGAAGGGAGCAGAGGGCGGCAGUCA<br/> AGCCUCUUCUGUUCUACUACGUAGUCGCAACAGUUCAGAAAU<br/> UCAACUCCAGGCAGCAGUAGGGGAACUUCUCCUGCUAGAAUGGCUG<br/> GCAAUGGCGGUGAUGCUGCUCUUGCUUUGCUGCUGCUUGACAGAU<br/> UGAACCAGCUUGAGAGCAAAAUGUCUGGUAAAGGCCAACAACAACA<br/> GGCCAAACUGUCACUAAGAAAUCUGCUGCUGAGGCUUCUAAGAAGC<br/> CUCGGCAAAAACGUACUGCCACUAAAGCAUACAUAUGUAACACAAGCU<br/> UUCGGCAGACGUGGUCCAGAACAACCCAAGGAAUUUUUGGGGACC<br/> AGGAACUAAUCAGACAAGGAACUGAUUACAACAUUGGCCGCAAAU<br/> GCACAUUUUGCCCCAGCGCUUCAGCGUUCUUCGGAAUGUCGCGCA<br/> UUGGCAUGGAAGUCACACCUUCGGGAACGUGGUUGACCUACACAGG<br/> UGCCAUCAAAUUGGAUGACAAAGAUCCAAAUUCAAAGAUCAAGUCA<br/> UUUUGCUGAAUAAGCAUUAUUGACGCAUACAACAAUUCACCAACA<br/> GAGCCUAAAAGGACAAAAGAAGAAGGCUGAUGAAACUCAAGCCUU<br/> ACCGCAGAGACAGAAGAAACAGCAAACUGUGACUCUUCUUCUGCU<br/> GCAGAUUUGGAUGAUUUCUCCAACAUAUGCAACAUAUCAUGAGCAG<br/> UGCUGACUCAACUCAGGCCUAAGAAUUCGAGCUCUGGUCGACA</p> |



**Luc-1710**

RNA containing the 1710 nt firefly luciferase open reading frame (gray highlight) plus flanking plasmid sequence.

GGUCUAGAAAUAUUUUUGUUUAACUUUAAGAAGGAGAUUAACCAUG  
AAAAUCGAAGAAGGUAAAAGGUCACCAUCACCAUCACCACGGAUCCA  
GGAAGACGCCAAAAACAUAAGAAAGGCCCGGCCAUUCUAUCCUC  
UAGAGGAUGGAACCGCUGGAGAGCAACUGCAUAAGGCUAUGAAGAG  
AUACGCCCUUGGUUCCUGGAACAAUUGCUIUUUACAGAUGCACAUU  
GAGGUGAACAUACGUACGCGGAAUACUUCGAAAUGUCCGUUCGGU  
UGGCAGAAGCUAUGAAACGAUAUGGGCUGAAUACAAAUCACAGAAUC  
GUCGUAUGCAGUGAAAACUCUCUUCAAUUCUUAUGCCGGUGUUGG  
GCGCGUUUUUAUCGGAGUUGCAGUUGC GCCCGCGAACGACAUUU  
UAAUGAACGUGAAUUGCUC AACAGUAUGAACAUUUCGCAGCCUACC  
GUAGUGUUUGUUUCCAAAAAGGGGUUGCAAAAAUUUUGAACGUGC  
AAAAAAAAUUACCAUAAUCCAGAAAAUUUUUAUCAUGGAUUCUAAAA  
CGGAUUACCGGGAUUUCAGUCGAUGUACACGUUCGUCACAUCUCA  
UCUACCUC CCGGUUUUAAUGAAUACGAUUUUGUACCAGAGUCCUUU  
GAUCGUGACAAAACA AUUGCACUGAUAAUGAAUUCUCUGGAUCUAC  
UGGGUUACCUAAGGGUGUGGCCCUUCCGCAUAGAACUGCCUGCGU  
CAGAUUCUCGCAUGCCAGAUCCU AUUUUUGGCAUCAAUUCAUU  
CCGGAUACUGCGAUUUUAAAGUGUUUGUCCAUUCCAGGUUUUG  
GAAUGUUUACUACACUCGGAU AUUUGAUUUGGAUUUCGAGUCGU  
CUUAAUGUAUAGAUUUGAAGAAGAGCUGUUUUUACGAUCCCUUCAG  
GAUUACA AAAUUCAAAGUGCGUUGCUAGUACCAACCCU AUUUUUCAU  
CUUCGCCAAAAGCACUCUGAUUGACAAAUACGAUUUAUCUAAUUUAC  
ACGAAAUUGCUUCUGGGGGCGCACCUUUCGAAAGAAGUCGGGGGA  
AGCGGUUGCAAAACGCUUCCAUCUUC CAGGGAUACGACAAGGAU AU  
GGGCUCACUGAGACUACAUCAGCUAUUCUGAUUACACCCGAGGGGG  
AUGAUAAACCGGGCGCGGUCGGUAAAGUUGUCCAUUUUUUUGAAGC  
GAAGGUUGUGGAUCUGGAUACCGGAAAACGUCGGGCGUUAUCAG  
AGAGGCGAAUUAUGUGUCAGAGGACCUAUGAUUAUGUCCGGUUAUG  
UAAACA AUCCGGAAGCGACCAACGCCUUGAUUGACAAGGAUGGAUG  
GCUACA UUCUGGAGACAUAGCUUACUGGGACGAAGACGAACACUUC  
UUCAUAGUUGACCGCUUGAAGUCUUUAAUUAAAUA CAAGGAUAUCA  
GGUGGCCCCCGCUGAAUUGGAAUCGAU AUUGUUACAACACCCCAAC  
AUCUUCGACGCGGGCGUGGCAGGUCUUC CCGACGAUGACGCCGGU  
GAACUUC CCGCCCGUUGUUGUUUUGGAGCACGGAAAGACGAUGA  
CGGAAAAGAGAUUCGUGGAUACGUCGCCAGUCAAGUAACAACCGC  
GAAAAGUUGCGCGGAGGAGUUGUGUUUGUGGACGAAGUACCGAAA  
GGUCUUAACCGGAAAACUCGACGCAAGAAAAAU CAGAGAGAUCCUCAU  
AAAGGCCAAGAAGGGCGGAAAGUCCAAACUCGAGUAAGGUUAACCU  
GCAGGAGG
